# Supplementary material for: Design and synthesis of amino acid derivatives of substituted benzimidazoles and pyrazoles as Sirt1 inhibitors
Source: Royal Society of Chemistry journal article supplement (doi:10.1039/d1ra06149f), 2022-01-01
Supplement: d1ra06149f1.pdf [file d1ra06149f1.pdf]

## Supplementary Information file

### Design and Synthesis of Amino Acid Derivatives of Substituted Benzimidazoles and Pyrazoles as Sirt1 Inhibitors

Nikil Purushotham<sup>a,§</sup>, Mrityunjay Singh<sup>b,c,§</sup>, Bugga Paramesha<sup>b,§</sup>, Vasantha Kumar<sup>a</sup>, Sharad  
Wakode<sup>c</sup>, Sanjay K Banerjee<sup>b,\*,#</sup>, Boja Poojary<sup>a,\*</sup>, Shailendra Asthana<sup>b,\*</sup>

<sup>a</sup>Department of Studies in Chemistry, Mangalore University, Mangalagangothri, Karnataka-574 199, India.

<sup>b</sup>Translational Health Science and Technology Institute (THSTI), Faridabad, Haryana-121001, India.

<sup>c</sup>Delhi Institute of Pharmaceutical Sciences and Research, DPSR University, M.B Road, Pushp Vihar, Sector 3, New Delhi -110017.

# Present address: Department of Biotechnology, National Institute of Pharmaceutical Education and Research (NIPER), Guwahati-781101, India

§ These authors contributed equally.

\*To whom the correspondence should be addressed

|                        |              |
|------------------------|--------------|
| Table S1.              | Page no. S2  |
| Fig. S1.               | Page no. S3  |
| Fig. S2.               | Page no. S4  |
| Fig. S3.               | Page no. S5  |
| Fig. S4.               | Page no. S6  |
| Fig. S5.               | Page no. S7  |
| Fig. S6.               | Page no. S8  |
| Fig. S7.               | Page no. S9  |
| Experimental Chemistry | Page no S10  |
| Fig. S8.               | Page no. S28 |

**Table S1.** The top 3 molecules obtain from computational virtual screening of *in-house* virtual library (1 million e-molecules) over Sirt1 (PDB id. 4I5I).

| Name | Chemical structure                                                                | Molecule ID | Docking score (kcal/mol) | MMGBSA (kcal/mol) |
|------|-----------------------------------------------------------------------------------|-------------|--------------------------|-------------------|
| V1   |  | 3281091     | -14.07                   | -90.45            |
| V2   |  | 2746690     | -13.64                   | -92.64            |
| V3   |  | 49334118    | -13.14                   | -74.44            |

**Fig. S1. Architecture of Sirt1 catalytic site:** (A) Structure of Human Sirt1 with inhibitor Ex527-analogue (Ex527\*) and co-factor NAD, “PDB id: 4I5I”. In right-inset, enlarged surface view of catalytic groove (cut-off distance 6.0 Å), with Ex527\*, NAD<sup>+</sup> and docked Ex527. NAD<sup>+</sup> is shown in licorice representation rendered in atom wise i.e. carbon atom in cyan color, while Ex527\* and Ex527 are shown in ball and sticks representation in which carbon atoms are in cyan and green color, respectively. (B) Comparison of interaction pattern of docked Sirt1-Ex527 complex with published crystal structure Sirt1-Ex527\* (PDB id. 4I5I) in 3D space. Ex527, Ex427\* are shown with “green” color and “ball-stick” representation. The key residues which cover the pocket from front face are shown in fluorescent cyan color stick representation. Other interacting residues are highlighted in transparent cyan color.



**Fig. S2: The concentration-response curve of Sirt1-inhibition.** Data was shown as Mean $\pm$ SEM, n=3.



**Fig. S3. Heat map of MM-GBSA and docking score of all designed compounds docked on Sirt1, Sirt2 and Sirt3. The cut-off scores are highlighted with dotted black box. All ligands are represented in the form of small square, color of square represent respective color of MM-GBSA heat-map. Ligand 7d, 13d, 13h and 13l are marked with arrows in left most panel.**



**Fig. S4.** The comparison of the 2d-interaction map of Sirt1 co-crystal (4I5I, Sirt1-Ex527\*) with docked complex (Sirt1-Ex527).



**Fig. S5. The residue interaction fraction analysis of Ex527\*.** The region highlighted in yellow background represents *hot-spot2*. The dashed line in light-blue color represent **cut-off** value **0.5**, which indicated that the specific interaction is maintained  $\geq 50\%$  of the total simulation time (A) Potential key residues within 3.5 Å cut-off from Ex527\*, in the most stable pose extracted from dynamics. (B) Residue interaction fraction analysis.



**Fig. S6. Establishment of SAR of Scheme1 compounds.** (A) Binding of scheme1 inhibitor (ball and stick representation), with –OMe substitution in R1 position, in catalytic pocket of Sirt1. The compound 7d is shown in color-type element with C in green. (B) Overlay binding of compounds 7l-7d, and 7h-7d at the catalytic pocket to speculate the difference in their binding pose. Sirt1 catalytic pocket is shown in the surface view. 7d is shown in representation “stick”, while compound 7l and 7h are shown in representation “ball and stick”. (C) MD trajectory analysis of scheme1 molecules (7l, 7h and 7d). The Root mean square deviation (RMSD) of protein (all backbone atoms) and ligand (no hydrogen atom) in coordinates as a function of the simulation time.



**Fig. S7.** The flow chart of overall computational protocol implemented in this study.



## Experimental chemistry

### Procedure for the synthesis of ethyl 4-(cyclohexylamino)-3-nitrobenzoate (**3**)

To a clear solution of ethyl 4-chloro-3-nitrobenzoate (**2**, 0.01 mol, 1.0 equiv.) in 15 mL of THF, cyclohexylamine (0.02 mol, 2.0 equiv.) and triethylamine (0.03 mol, 3.0 equiv.) were added and stirred at room temperature for 24 h. The progress of the reaction was monitored by TLC. After completion of the reaction, the reaction mixture was quenched with crushed ice and left undisturbed for two hours. The resulting yellow solid was washed with water, filtered and dried. The crude product was recrystallized from ethyl alcohol to obtain the pure product.

### Procedure for the synthesis of benzimidazole esters (**4a-c**)

Sodium dithionite (0.03 mol, 3.0 equiv.) was added to a clear solution of ethyl 4-(cyclohexylamino)-3-nitrobenzoate (**3**) (0.01 mol; 1.0 equiv.) and substituted benzaldehyde (0.01 mol; 1.0 equiv.) in DMSO (15 mL). The reaction mixture was stirred at 90 °C for 3 h. After completion of the reaction (monitored by TLC hexane: ethyl acetate (8: 2, v/v)), the reaction mass was allowed to cool to room temperature and poured onto crushed ice. The solid separated was filtered, washed with water, dried and recrystallized from ethyl alcohol to obtain the pure product.

**Ethyl 1-cyclohexyl-2-(4-methoxyphenyl)-1H-benzo[d]imidazole-5-carboxylate (4a):** Yield 92%; Mp 118-120 °C; Off white to pale yellow solid; FT IR (ATR,  $\nu_{\max}$ ,  $\text{cm}^{-1}$ ): 3001 (Ar-H), 2933, 2856 (C-H), 1705 (C=O), 1610 (C=N), 1529 (C=C), 1172 (C-O);  $^1\text{H}$  NMR (400 MHz,  $\text{CDCl}_3$ ,  $\delta$  ppm): 8.52 (d, 1H, Ar-H,  $J = 1.2$  Hz), 7.98 (dd, 1H, Ar-H,  $J = 1.6$  Hz, 8.8 Hz), 7.66 (d, 1H, Ar-H,  $J = 8.8$  Hz), 7.59 (d, 2H, Ar-H,  $J = 6.8$  Hz), 7.07 (d, 2H, Ar-H,  $J = 6.8$  Hz), 4.40-4.45 (q, 2H,  $-\text{CH}_2$  of ethyl,  $J = 7.2$  Hz), 4.33-4.39 (m, 1H, N-CH of cyclohexyl), 3.90 (s, 3H, O- $\text{CH}_3$ ), 2.27-2.36 (m, 2H, cyclohexyl), 1.95-1.99 (m, 4H, cyclohexyl), 1.77-1.79 (m, 1H, cyclohexyl), 1.43 (t, 3H,  $-\text{CH}_3$  of ethyl,  $J = 7.2$  Hz), 1.33-1.38 (m, 3H, cyclohexyl);  $^{13}\text{C}$  NMR (100 MHz,  $\text{CDCl}_3$ ,  $\delta$  ppm): 167.2, 160.9, 155.5, 143.4, 137.3, 130.8, 124.3, 123.4, 122.8, 122.2, 114.2, 112.0, 60.8, 57.1, 55.4, 31.4, 25.9, 25.2, 14.4; ESI-MS ( $m/z$ ): 379.2  $[\text{M}+\text{H}]^+$ ; Anal. calcd. for  $\text{C}_{23}\text{H}_{26}\text{N}_2\text{O}_3$ : C, 72.99; H, 6.92; N, 7.40. Found: C, 72.97; H, 6.94; N, 7.37.

**Ethyl 1-cyclohexyl-2-(4-fluorophenyl)-1H-benzo[d]imidazole-5-carboxylate (4b):** Yield 87%; Mp 130-132 °C; Off white to pale brown solid; FT IR (ATR,  $\nu_{\max}$ ,  $\text{cm}^{-1}$ ): 3050 (Ar-H), 2927, 2850 (C-H), 1705 (C=O), 1602 (C=N), 1527 (C=C), 1300 (C-O), 1224 (C-F);  $^1\text{H}$  NMR (400 MHz,  $\text{CDCl}_3$ ,  $\delta$  ppm): 8.52 (d, 1H, Ar-H,  $J = 1.2$  Hz), 8.00 (dd, 1H, Ar-H,  $J = 1.6$  Hz, 8.8 Hz), 7.67 (d, 1H, Ar-H,  $J = 8.8$  Hz), 7.62-7.66 (m, 2H, Ar-H), 7.23-7.27 (m, 2H, Ar-H), 4.4-4.45 (q, 2H,  $-\text{CH}_2$  of ethyl group,  $J = 7.2$  Hz), 4.29-4.35 (m, 1H, cyclohexyl N-CH), 2.27-2.36

(m, 2H, cyclohexyl), 1.95-2.03 (m, 4H, cyclohexyl), 1.76-1.8 (m, 1H, cyclohexyl), 1.43 (t, 3H, -CH<sub>3</sub> of ethyl group,  $J = 7.2$  Hz), 1.35-1.36 (m, 3H, cyclohexyl); <sup>13</sup>C NMR (100 MHz, CDCl<sub>3</sub>,  $\delta$  ppm): 167.1, 163.7 (d,  $^1J_{F-C} = 249.1$  Hz), 154.4, 143.3, 137.1, 131.4 (d,  $^3J_{F-C} = 8.6$  Hz), 126.8 (d,  $^4J_{F-C} = 3.5$  Hz), 124.6, 123.7, 122.46, 116.0 (d,  $^2J_{F-C} = 21.8$  Hz), 112.1, 60.8, 57.3, 31.5, 25.9, 25.2, 14.4; ESI-MS ( $m/z$ ): 367.3 [M+H]<sup>+</sup>; Anal. calcd. for C<sub>22</sub>H<sub>23</sub>N<sub>2</sub>FO<sub>2</sub>: C, 72.11; H, 6.33; N, 7.64. Found: C, 72.10; H, 6.29; N, 7.62.

***Ethyl 2-(2-chloro-6-fluorophenyl)-1-cyclohexyl-1H-benzof[d]imidazole-5-carboxylate (4c):*** Yield 82%; Mp 104-106 °C; Pale yellow crystalline solid; FT IR (ATR,  $\nu_{\max}$ , cm<sup>-1</sup>): 3000 (Ar-H), 2943, 2858 (C-H), 1710 (C=O), 1618 (C=N), 1570 (C=C), 1298 (C-O), 1249 (C-F), 790 (C-Cl); <sup>1</sup>H NMR (400 MHz, CDCl<sub>3</sub>,  $\delta$  ppm): 8.49 (d, 1H, Ar-H,  $J = 1.6$  Hz), 7.96 (dd, 1H, Ar-H,  $J = 1.6$  Hz, 8.8 Hz), 7.61 (d, 1H, Ar-H,  $J = 8.4$  Hz), 7.39-7.45 (m, 1H, Ar-H), 7.31 (d, 1H, Ar-H,  $J = 8.0$  Hz), 7.10 (t, 1H, Ar-H,  $J = 8.4$  Hz), 4.32-4.37 (q, 2H, -CH<sub>2</sub> of ethyl group,  $J = 6.8$  Hz), 3.74-3.81 (m, 1H, cyclohexyl N-CH), 2.05-2.14 (m, 2H, cyclohexyl), 1.83-1.99 (m, 4H, cyclohexyl), 1.67 (m, 1H, cyclohexyl), 1.34 (t, 3H, -CH<sub>3</sub> of ethyl group,  $J = 6.8$  Hz), 1.20-1.21 (m, 3H, cyclohexyl); <sup>13</sup>C NMR (100 MHz, CDCl<sub>3</sub>,  $\delta$  ppm): 167.0, 161.5 (d,  $^1J_{F-C} = 250.5$  Hz), 146.7, 143.6, 136.5, 136.1 (d,  $^3J_{F-C} = 8.6$  Hz), 132.3 (d,  $^3J_{F-C} = 9.4$  Hz), 125.6 (d,  $^4J_{F-C} = 3.5$  Hz), 124.5, 124.0, 122.9, 119.4 (d,  $^2J_{F-C} = 20$  Hz), 114.4 (d,  $^2J_{F-C} = 21.6$  Hz), 111.8, 60.8, 57.9, 31.4, 25.9, 25.2, 14.4; ESI-MS ( $m/z$ ): 401.3 [M+H]<sup>+</sup>, 403.3 [M+2H]<sup>+</sup>; Anal. calcd. for C<sub>22</sub>H<sub>22</sub>N<sub>2</sub>ClFO<sub>2</sub>: C, 65.91; H, 5.53; N, 6.99. Found: C, 65.89; H, 5.51; N, 7.02.

### Procedure for the synthesis of benzimidazole carboxylic acids (5a-c)

To a clear solution of **4 a-c** (0.01 mol) in minimum amount of ethanol, catalytic amount of sodium hydroxide in 20 mL of water was added and the solution was refluxed for 3 h. After the completion of the reaction (monitored by TLC, hexane: ethyl acetate (8:2, v/v)), the cooled reaction mixture was poured onto crushed ice and acidified with dilute HCl. The solid obtained was washed with water, filtered, dried and recrystallized from ethyl alcohol to obtain pure product.

***1-Cyclohexyl-2-(4-methoxyphenyl)-1H-benzof[d]imidazole-5-carboxylic acid (5a):*** Yield 92%; Mp 244-246 °C; Off white solid; FT IR (ATR,  $\nu_{\max}$ , cm<sup>-1</sup>): 3462 (O-H), 3001 (Ar-H), 2933, 2856 (C-H), 1702 (C=O), 1610 (C=N), 1529 (C=C), 1172 (C-O); <sup>1</sup>H NMR (400 MHz, DMSO-*d*<sub>6</sub>,  $\delta$  ppm): 12.81 (bs, 1H, CO<sub>2</sub>H), 8.53 (d, 1H, Ar-H,  $J = 1.2$  Hz), 7.98 (dd, 1H, Ar-H,  $J = 1.6$  Hz, 8.8 Hz), 7.66 (d, 1H, Ar-H,  $J = 8.8$  Hz), 7.59 (d, 2H, Ar-H,  $J = 6.8$  Hz), 7.07 (d,

2H, Ar-H,  $J = 6.8$  Hz), 4.33-4.39 (m, 1H, N-CH of cyclohexyl), 3.90 (s, 3H, O-CH<sub>3</sub>), 2.27-2.36 (m, 2H, cyclohexyl), 1.95-1.99 (m, 4H, cyclohexyl), 1.77-1.79 (m, 1H, cyclohexyl), 1.33-1.38 (m, 3H, cyclohexyl); <sup>13</sup>C NMR (100 MHz, DMSO-*d*<sub>6</sub>,  $\delta$  ppm): 167.3, 160.9, 155.5, 143.4, 137.3, 130.8, 124.3, 123.4, 122.8, 122.2, 114.2, 112.0, 57.1, 55.4, 31.4, 25.9, 25.2; ESI-MS ( $m/z$ ): 351.1 [M+H]<sup>+</sup>; Anal. calcd. for C<sub>21</sub>H<sub>22</sub>N<sub>2</sub>O<sub>3</sub>: C, 71.98; H, 6.33; N, 7.99. Found: C, 71.97; H, 6.30; N, 7.94.

**1-Cyclohexyl-2-(4-fluorophenyl)-1H-benzod[*h*]imidazole-5-carboxylic acid (5b):** Yield 94%; Mp 248-250 °C; Off white solid; FT IR (ATR,  $\nu_{\max}$ , cm<sup>-1</sup>): 3450 (O-H), 3050 (Ar-H), 2927, 2850 (C-H), 1703 (C=O), 1601 (C=N), 1527 (C=C), 1300 (C-O), 1224 (C-F); <sup>1</sup>H NMR (400 MHz, DMSO-*d*<sub>6</sub>,  $\delta$  ppm): 12.80 (bs, 1H, CO<sub>2</sub>H), 8.51 (d, 1H, Ar-H,  $J = 1.2$  Hz), 8.00 (dd, 1H, Ar-H,  $J = 1.6$  Hz, 8.8 Hz), 7.67 (d, 1H, Ar-H,  $J = 8.8$  Hz), 7.62-7.66 (m, 2H, Ar-H), 7.23-7.27 (m, 2H, Ar-H), 4.29-4.35 (m, 1H, cyclohexyl N-CH), 2.27-2.36 (m, 2H, cyclohexyl), 1.95-2.03 (m, 4H, cyclohexyl), 1.76-1.8 (m, 1H, cyclohexyl), 1.35-1.36 (m, 3H, cyclohexyl); <sup>13</sup>C NMR (100 MHz, DMSO-*d*<sub>6</sub>,  $\delta$  ppm): 167.1, 163.7 (d, <sup>1</sup> $J_{\text{F-C}} = 240$  Hz), 154.4, 143.3, 137.1, 131.4 (d, <sup>3</sup> $J_{\text{F-C}} = 10$  Hz), 126.8, 124.6, 123.7, 122.46, 116.1 (d, <sup>2</sup> $J_{\text{F-C}} = 21.4$  Hz), 112.1, 57.3, 31.5, 25.9, 25.2; ESI-MS ( $m/z$ ): 339.3 [M+H]<sup>+</sup>; Anal. calcd. for C<sub>20</sub>H<sub>19</sub>N<sub>2</sub>FO<sub>2</sub>: C, 70.99; H, 5.66; N, 8.28. Found: C, 70.97; H, 5.62; N, 8.24.

**2-(2-Chloro-6-fluorophenyl)-1-cyclohexyl-1H-benzod[*h*]imidazole-5-carboxylic acid (5c):** Yield 96%; Mp 232-234 °C; Off white solid; FT IR (ATR,  $\nu_{\max}$ , cm<sup>-1</sup>): 3500 (O-H), 2941, 2862 (C-H), 1706 (C=O), 1620 (C=N), 1572 (C=C), 1298 (C-O), 1248 (C-F), 779 (C-Cl); <sup>1</sup>H NMR (400 MHz, DMSO-*d*<sub>6</sub>,  $\delta$  ppm): 12.82 (bs, 1H, CO<sub>2</sub>H), 8.30 (s, 1H, Ar-H), 8.01 (d, 1H, Ar-H,  $J = 12.0$  Hz), 7.93 (d, 1H, Ar-H,  $J = 8.4$  Hz), 7.73-7.71 (m, 1H, Ar-H), 7.63 (d, 1H, Ar-H,  $J = 8.0$  Hz), 7.51 (t, 1H, Ar-H,  $J = 8.0$  Hz), 3.84-3.90 (m, 1H, cyclohexyl N-CH), 2.14-2.23 (m, 2H, cyclohexyl), 1.78-1.92 (m, 4H, cyclohexyl), 1.58 (m, 1H, cyclohexyl), 1.23-1.32 (m, 3H, cyclohexyl); <sup>13</sup>C NMR (100 MHz, DMSO-*d*<sub>6</sub>,  $\delta$  ppm): 167.6, 160.7 (d, <sup>1</sup> $J_{\text{F-C}} = 240$  Hz), 146.1, 143.0, 136.5, 136.1 (d, <sup>3</sup> $J_{\text{F-C}} = 8.6$  Hz), 132.3 (d, <sup>3</sup> $J_{\text{F-C}} = 9.4$  Hz), 125.9, 124.7, 123.8, 121.5, 118.3 (d, <sup>2</sup> $J_{\text{F-C}} = 20$  Hz), 115.0 (d, <sup>2</sup> $J_{\text{F-C}} = 20$  Hz), 112.7, 57.2, 30.7, 25.2, 24.3; ESI-MS ( $m/z$ ): 373.3 [M+H]<sup>+</sup>, 375.3 [M+2+H]<sup>+</sup>; Anal. calcd. for C<sub>20</sub>H<sub>18</sub>N<sub>2</sub>ClFO<sub>2</sub>: C, 64.43; H, 4.87; N, 7.51. Found: C, 64.41; H, 4.83; N, 7.54.

#### Procedure for the synthesis of benzimidazole mono-peptide esters (6a-l)

To a clear solution of **5a-c** (0.01 mol) in 15 mL of DMF, NMM (0.025 mol, 2.5 equiv.) and TBTU (0.0125 mol, 1.25 equiv.) were added and stirred for an hour at room temperature. To

the clear resulting solution, amino acid methyl ester hydrochloride (0.01 mol, 1.0 equiv.) was added and stirred at room temperature for 4 h. After completion of the reaction (monitored by TLC hexane: ethyl acetate (7:3, v/v)), the reaction mass was poured onto crushed ice. The precipitated solid was washed with water, filtered, dried column purified using 5-15% of ethyl acetate in hexane to obtain the pure product.

**Methyl (S)-(1-cyclohexyl-2-(4-methoxyphenyl)-1H-benzo[d]imidazole-5-carbonyl)alaninate (6a):** Yield 90%; Mp 134-136 °C; Off white solid; FT IR (ATR,  $\nu_{\max}$ ,  $\text{cm}^{-1}$ ): 3078 (Ar-H), 2935 and 2854 (C-H), 1726 (C=O of ester), 1652 (C=O of amide), 1612 (C=N), 1577 (C=C), 1029 (C-O);  $^1\text{H}$  NMR (400 MHz,  $\text{CDCl}_3$ ,  $\delta$  ppm): 8.65 (d, 1H, amide N-H,  $J = 7.2$  Hz), 8.27 (d, 1H, Ar-H,  $J = 1.2$  Hz), 7.90 (d, 1H, Ar-H,  $J = 8.4$  Hz), 7.80 (dd, 1H, Ar-H,  $J = 1.6$  Hz, 7.2 Hz), 7.61 (d, 1H, Ar-H,  $J = 8.8$  Hz), 7.15 (d, 1H, Ar-H,  $J = 9.2$  Hz), 4.42-4.49 (m, 1H, chiral CH), 4.26-4.32 (m, 1H, N-CH), 3.86 (s, 3H,  $\text{OCH}_3$ ), 3.79 (s, 3H,  $\text{OCH}_3$ ), 2.25-2.33 (m, 2H, cyclohexyl), 1.84-1.92 (m, 4H, cyclohexyl), 1.63-1.66 (m, 1H, cyclohexyl), 1.42-1.44 (d, 3H,  $\text{CH}_3$ ,  $J = 7.2$  Hz), 1.23-1.39 (m, 3H, cyclohexyl);  $^{13}\text{C}$  NMR (100 MHz,  $\text{CDCl}_3$ ,  $\delta$  ppm): 174.4, 166.4, 160.4, 154.7, 142.8, 135.7, 130.8, 127.5, 122.5, 121.6, 118.7, 114.2, 112.4, 56.7, 55.3, 51.9, 48.2, 30.5, 25.5, 24.4, 16.9; ESI-MS ( $m/z$ ): 436.2  $[\text{M}+\text{H}]^+$ ; Anal. calcd. for  $\text{C}_{25}\text{H}_{29}\text{N}_3\text{O}_4$ : C, 68.95; H, 6.71; N, 9.65. Found: C, 68.96; H, 6.70; N, 9.62.

**Methyl (S)-(1-cyclohexyl-2-(4-methoxyphenyl)-1H-benzo[d]imidazole-5-carbonyl)valinate (6b):** Yield 62%; Mp 68-70 °C; Off white solid; FT IR (ATR,  $\nu_{\max}$ ,  $\text{cm}^{-1}$ ): 3409 (NH), 3100 (Ar-H), 2935 and 2850 (C-H), 1722 (C=O of ester), 1650 (C=O of amide), 1612 (C=N), 1581 (C=C), 1029 (C-O);  $^1\text{H}$  NMR (400 MHz,  $\text{CDCl}_3$ ,  $\delta$  ppm): 8.33 (d, 1H, amide NH,  $J = 8.0$  Hz); 8.27 (d, 1H, Ar-H,  $J = 1.2$  Hz), 7.89 (d, 1H, Ar-H,  $J = 8.8$  Hz), 7.79 (dd, 1H, Ar-H,  $J = 1.6$  Hz, 8.4 Hz), 7.61 (d, 2H, Ar-H,  $J = 8.8$  Hz), 7.15 (d, 2H, Ar-H,  $J = 8.8$  Hz), 4.26-4.32 (m, 2H, N-CH and chiral CH), 3.86 (s, 3H,  $\text{OCH}_3$ ), 3.79 (s, 3H,  $\text{OCH}_3$ ), 2.19-2.33 (m, 3H, CH and cyclohexyl), 1.84-1.90 (m, 4H, cyclohexyl), 1.63-1.66 (m, 1H, cyclohexyl), 1.23-1.41 (m, 3H, cyclohexyl), 0.97-1.01 (m, 6H, diastereotopic  $\text{CH}_3$ );  $^{13}\text{C}$  NMR (100 MHz,  $\text{CDCl}_3$ ,  $\delta$  ppm): 174.3, 166.9, 160.4, 154.6, 142.7, 135.7, 130.8, 127.8, 122.5, 121.7, 118.8, 114.2, 112.4, 58.6, 56.7, 55.3, 51.8, 30.5, 29.6, 25.5, 24.4, 19.4, 18.8; ESI-MS ( $m/z$ ): 464.4  $[\text{M}+\text{H}]^+$ ; Anal. calcd. for  $\text{C}_{27}\text{H}_{33}\text{N}_3\text{O}_4$ : C, 69.96; H, 7.18; N, 9.06. Found: C, 69.94; H, 7.15; N, 9.03.

**Methyl (S)-(1-cyclohexyl-2-(4-methoxyphenyl)-1H-benzo[d]imidazole-5-carbonyl)leucinate (6c):** Yield 75%; Mp: 82-84 °C; Off white solid; FT IR (ATR,  $\nu_{\max}$ ,  $\text{cm}^{-1}$ ): 3074 (Ar-H), 2935 and 2862 (C-H), 1726 (C=O of ester), 1650 (C=O of amide), 1612 (C=N), 1577 (C=C), 1029

(C-O);  $^1\text{H}$  NMR (400 MHz,  $\text{CDCl}_3$ ,  $\delta$  ppm): 8.33 (d, 1H, amide NH,  $J = 6.8$  Hz), 8.23 (s, 1H, Ar-H), 7.88 (d, 1H, Ar-H,  $J = 8.4$  Hz), 7.78 (d, 1H, Ar-H,  $J = 8.4$  Hz), 7.60 (d, 1H, Ar-H,  $J = 8.4$  Hz), 7.14 (d, 1H, Ar-H,  $J = 8.8$  Hz), 4.37-4.40 (m, 1H, chiral CH), 4.25-4.31 (m, 1H, C-NH), 3.86 (s, 3H,  $\text{OCH}_3$ ), 3.79 (s, 3H,  $\text{OCH}_3$ ), 2.24-2.33 (m, 2H, cyclohexyl), 1.83-1.90 (m, 4H, cyclohexyl), 1.62-1.76 (m, 4H, isobutyl CH,  $\text{CH}_2$  and cyclohexyl), 1.24-1.41 (m, 3H, cyclohexyl), 0.89-0.92 (m, 6H, diastereotopic  $\text{CH}_3$ );  $^{13}\text{C}$  NMR (100 MHz,  $\text{CDCl}_3$ ,  $\delta$  ppm): 174.4, 166.4, 160.4, 154.6, 142.8, 135.6, 130.8, 128.0, 122.5, 121.5, 118.6, 114.2, 112.4, 56.6, 55.3, 52.2, 30.5, 29.6, 25.5, 24.6, 23.0, 21.6, 18.9; ESI-MS ( $m/z$ ): 478.4  $[\text{M}+\text{H}]^+$ ; Anal. calcd. for  $\text{C}_{28}\text{H}_{35}\text{N}_3\text{O}_4$ : C, 70.42; H, 7.39; N, 8.80. Found: C, 70.40; H, 7.35; N, 8.81.

**Methyl (S)-(1-cyclohexyl-2-(4-methoxyphenyl)-1H-benzodimidazole-5-carbonyl)tryptophanate (6d):** Yield 99%, Mp: 86-88 °C; Off white to pale brown solid; FT IR (ATR,  $\nu_{\text{max}}$ ,  $\text{cm}^{-1}$ ): 3055 (Ar-H), 2933 and 2856 (C-H), 1728 (C=O of ester), 1643 (C=O of amide), 1612 (C=N), 1577 (C=C), 1178 (C-O);  $^1\text{H}$  NMR (400 MHz,  $\text{CDCl}_3$ ,  $\delta$  ppm): 10.81 (s, 1H, indole NH), 8.62 (d, 1H, amide NH,  $J = 7.6$  Hz), 8.20 (d, 1H, Ar-H,  $J = 1.6$  Hz), 7.88 (d, 1H, Ar-H,  $J = 8.4$  Hz), 7.73 (dd, 1H, Ar-H,  $J = 8.4$  Hz, 1.6 Hz), 7.59-7.63 (m, 3H, Ar-H), 7.32 (d, 1H, Ar-H,  $J = 8.0$  Hz), 7.23 (d, 1H, Ar-H,  $J = 2.0$  Hz), 7.15 (d, 2H, Ar-H,  $J = 8.8$  Hz), 7.04-7.08 (m, 1H, Ar-H), 6.97-7.01 (m, 1H, Ar-H), 4.66-4.72 (m, 1H, chiral CH), 4.25-4.31 (m, 1H, C-NH), 3.86 (s, 3H,  $\text{OCH}_3$ ), 3.79 (s, 3H,  $\text{OCH}_3$ ), 2.23-2.29 (m, 2H, cyclohexyl), 1.83-1.89 (m, 4H, cyclohexyl), 1.62-1.65 (m, 1H, cyclohexyl), 1.25-1.41 (m, 3H, cyclohexyl);  $^{13}\text{C}$  NMR (100 MHz,  $\text{CDCl}_3$ ,  $\delta$  ppm): 173.7, 166.6, 160.4, 154.6, 142.6, 136.1, 135.6, 130.9, 127.6, 127.1, 125.76, 123.6, 121.6, 120.9, 118.5, 118.4, 118.1, 114.2, 112.5, 111.4, 110.5, 56.7, 55.3, 53.7, 52.4, 30.5, 26.6, 25.5, 24.3; ESI-MS ( $m/z$ ): 551.3  $[\text{M}+\text{H}]^+$ ; Anal. calcd. for  $\text{C}_{33}\text{H}_{34}\text{N}_4\text{O}_4$ : C, 71.98; H, 6.22; N, 10.17. Found: C, 71.95; H, 6.20; N, 10.13

**Methyl (S)-(1-cyclohexyl-2-(4-fluorophenyl)-1H-benzodimidazole-5-carbonyl)alaninate (6e):** Yield 86%; Mp 128-130 °C; Off white solid; IR (ATR,  $\nu_{\text{max}}$ ,  $\text{cm}^{-1}$ ): 3071 (Ar-H), 2932 and 2861 (C-H), 1730 (C=O of ester), 1653 (C=O of amide), 1614 (C=N), 1578 (C=C), 1265 (C-O), 1230 (C-F);  $^1\text{H}$  NMR (400 MHz,  $\text{CDCl}_3$ ,  $\delta$  ppm): 8.63 (d, 1H, amide N-H,  $J = 7.2$  Hz), 8.29 (s, 1H, Ar-H), 7.93 (d, 1H, Ar-H,  $J = 8.8$  Hz), 7.83 (d, 1H, Ar-H,  $J = 8.8$  Hz), 7.71-7.75 (m, 2H, Ar-H), 7.42-7.46 (m, 2H, Ar-H), 4.41-4.48 (m, 1H, chiral CH), 4.20-4.26 (m, 1H, N-CH), 3.79 (s, 3H,  $\text{OCH}_3$ ), 2.24-2.32 (m, 2H, cyclohexyl), 1.83-1.93 (m, 4H, cyclohexyl), 1.63-1.66 (m, 1H, cyclohexyl), 1.42-1.44 (d, 3H,  $\text{CH}_3$ ,  $J = 7.2$  Hz), 1.23-1.38 (m, 3H, cyclohexyl);  $^{13}\text{C}$  NMR (100 MHz,  $\text{CDCl}_3$ ,  $\delta$  ppm): 174.5, 166.3, 163.1 (d,  $^1J_{\text{F-C}} = 246$  Hz), 153.7, 142.7, 135.7, 131.8 (d,  $^3J_{\text{F-C}} = 8.5$  Hz), 127.7, 126.9, 121.9, 118.9, 115.9 (d,  $^2J_{\text{F-C}} = 21.5$  Hz), 112.6,

56.8, 52.1, 48.4, 30.5, 25.4, 24.3, 17.1; ESI-MS ( $m/z$ ): 424.4 [M+H]<sup>+</sup>; Anal. calcd. for C<sub>24</sub>H<sub>26</sub>N<sub>3</sub>FO<sub>3</sub>: C, 68.07; H, 6.19; N, 9.92. Found: C, 68.02; H, 6.15; N, 9.91.

**Methyl (S)-(1-cyclohexyl-2-(4-fluorophenyl)-1H-benzof[d]imidazole-5-carbonyl)valinate (6f):** Yield 92%; 118-120 °C; Off white solid; IR (ATR,  $\nu_{\max}$ , cm<sup>-1</sup>): 3407 (N-H), 3074 (Ar-H), 2935 and 2864 (C-H), 1721 (C=O of ester), 1654 (C=O of amide), 1614 (C=N), 1581 (C=C), 1265 (C-O), 1232 (C-F); <sup>1</sup>H NMR (400 MHz, CDCl<sub>3</sub>,  $\delta$  ppm): 8.52 (d, 1H, amide N-H,  $J$  = 7.6 Hz), 8.20 (d, 1H, Ar-H,  $J$  = 1.2 Hz), 7.90 (d, 1H, Ar-H,  $J$  = 8.8 Hz), 7.74-7.76 (m, 1H, Ar-H), 7.71-7.73 (m, 2H, Ar-H), 7.42-7.46 (m, 2H, Ar-H), 4.29-4.32 (m, 1H, chiral CH), 4.26-4.28 (m, 1H, N-CH), 3.79 (s, 3H, OCH<sub>3</sub>), 2.25-2.33 (m, 2H, cyclohexyl), 2.20-2.25 (m, 1H, C-H of isopropyl), 1.84-1.90 (m, 4H, cyclohexyl), 1.63-1.66 (m, 1H, cyclohexyl), 1.24-1.41 (m, 3H, cyclohexyl), 0.97-1.01 (m, 6H, diastereotopic CH<sub>3</sub>); <sup>13</sup>C NMR (100 MHz, CDCl<sub>3</sub>,  $\delta$  ppm): 174.4, 166.9, 162.9 (d, <sup>1</sup>J<sub>F-C</sub> = 250 Hz), 154.6, 142.8, 135.7, 131.8 (d, <sup>3</sup>J<sub>F-C</sub> = 9.6 Hz), 127.5, 122.5, 121.6, 118.7, 115.8 (d, <sup>2</sup>J<sub>F-C</sub> = 21 Hz), 112.4, 58.6, 56.3, 52.3, 30.5, 29.6, 25.5, 24.4, 19.4, 18.8; ESI-MS ( $m/z$ ): 452.4 [M+H]<sup>+</sup>; Anal. calcd. for C<sub>26</sub>H<sub>30</sub>N<sub>3</sub>FO<sub>3</sub>: C, 69.16; H, 6.70; N, 9.31. Found: C, 69.13; H, 6.69; N, 9.32.

**Methyl (S)-(1-cyclohexyl-2-(4-fluorophenyl)-1H-benzof[d]imidazole-5-carbonyl)leucinate (6g):** Yield 96%, 102-104 °C; Off white solid; IR (ATR,  $\nu_{\max}$ , cm<sup>-1</sup>): 3409 (N-H), 3071 (Ar-H), 2934 and 2865 (C-H), 1717 (C=O of ester), 1654 (C=O of amide), 1614 (C=N), 1579 (C=C), 1265 (C-O), 1231 (C-F); <sup>1</sup>H NMR (400 MHz, CDCl<sub>3</sub>,  $\delta$  ppm): 8.59 (d, 1H, amide N-H,  $J$  = 7.6 Hz), 8.3 (s, 1H, Ar-H), 7.93 (d, 1H, Ar-H,  $J$  = 8.4 Hz), 7.84 (d, 2H, Ar-H,  $J$  = 8.4 Hz), 7.72-7.75 (m, 2H, Ar-H), 7.42-7.46 (m, 2H, Ar-H), 4.47-4.52 (m, 1H, chiral CH), 4.20-4.26 (m, 1H, N-CH), 3.79 (s, 3H, OCH<sub>3</sub>), 2.24-2.32 (m, 2H, cyclohexyl), 1.59-1.92 (m, 8H, cyclohexyl, isobutyl CH and diastereotopic CH<sub>2</sub>), 1.23-1.41 (m, 3H, cyclohexyl), 0.95 (d, 3H, diastereotopic CH<sub>3</sub>,  $J$  = 6.4 Hz) 0.91 (d, 3H, diastereotopic CH<sub>3</sub>,  $J$  = 6.4 Hz); <sup>13</sup>C NMR (100 MHz, CDCl<sub>3</sub>,  $\delta$  ppm): 174.4, 166.7, 162.9 (d, <sup>1</sup>J<sub>F-C</sub> = 250 Hz), 153.7, 142.6, 135.6, 131.7 (d, <sup>3</sup>J<sub>F-C</sub> = 9.6 Hz), 127.7, 126.8, 121.9, 118.9, 115.8 (d, <sup>2</sup>J<sub>F-C</sub> = 20 Hz), 112.6, 56.8, 52.1, 50.9, 30.5, 25.4, 24.6, 24.3, 22.9, 21.2; ESI-MS ( $m/z$ ): 466.4 [M+H]<sup>+</sup>; Anal. calcd. for C<sub>27</sub>H<sub>32</sub>N<sub>3</sub>FO<sub>3</sub>: C, 69.66; H, 6.93; N, 9.03. Found: C, 69.64; H, 6.91; N, 9.04.

**Methyl (S)-(1-cyclohexyl-2-(4-fluorophenyl)-1H-benzof[d]imidazole-5-carbonyl)-tryptophanate (6h):** Yield 96%; Mp 78-80 °C; Off white solid; FT IR (ATR,  $\nu_{\max}$ , cm<sup>-1</sup>): 3409 (N-H), 3056 (Ar-H), 2933 and 2858 (C-H), 1720 (C=O of ester), 1641 (C=O of amide), 1614 (C=N), 1527 (C=C), 1296 (C-O), 1230 (C-F); <sup>1</sup>H NMR (400 MHz, CDCl<sub>3</sub>,  $\delta$  ppm): 10.79

(s, 1H, indole-NH), 8.52 (d, 1H, amide-NH,  $J = 7.6$  Hz), 8.2 (d, 1H, Ar-H,  $J = 1.2$  Hz), 7.90 (d, 1H, Ar-H,  $J = 8.8$  Hz), 7.71-7.76 (m, 3H, Ar-H), 7.62 (d, 1H, Ar-H,  $J = 8.0$  Hz), 7.44 (m, 2H, Ar-H,  $J = 8.8$  Hz), 7.32 (d, 1H, Ar-H,  $J = 8.0$  Hz), 7.22 (d, 1H, Ar-H,  $J = 2.0$  Hz), 7.03-7.07 (m, 1H, Ar-H); 6.95-6.99 (m, 1H, Ar-H); 4.63-4.68 (m, 1H, chiral C-H), 4.19-4.25 (m, 1H, -NC-H), 3.79 (s, 3H, OCH<sub>3</sub>), 3.35 (dd, 1H, indole CH<sub>2</sub>,  $J = 4.2$  Hz, 14.6 Hz), 3.26 (dd, 1H, indole CH<sub>2</sub>,  $J = 9.2$  Hz, 14.4 Hz), 2.22-2.31 (m, 2H, cyclohexyl), 1.82-1.92 (m, 4H, cyclohexyl), 1.62-1.65 (m, 1H, cyclohexyl), 1.26-1.40 (m, 3H, cyclohexyl); <sup>13</sup>C NMR (100 MHz, CDCl<sub>3</sub>,  $\delta$  ppm): 173.8, 166.3, 162.9 (d,  $^1J_{\text{F-C}} = 250$  Hz), 164.2, 161.7, 153.7, 142.6, 136.0, 135.6, 131.7 (d,  $^3J_{\text{F-C}} = 9.6$  Hz), 128.0, 127.3, 126.9, 125.9, 123.5, 121.7, 120.8, 118.7, 118.2, 115.8 (d,  $^2J_{\text{F-C}} = 20$  Hz), 112.6, 111.3, 110.7, 56.8, 54.1, 51.9, 30.5, 26.8, 25.4, 24.3; ESI-MS ( $m/z$ ): 539.22 [M+H]<sup>+</sup>; Anal. calcd. for C<sub>32</sub>H<sub>31</sub>N<sub>4</sub>FO<sub>3</sub>: C, 71.36; H, 5.80; N, 10.40. Found: C, 71.37; H, 5.78; N, 10.36.

**Methyl (S)-(2-(2-chloro-6-fluorophenyl)-1-cyclohexyl-1H-benzo[d]imidazole-5-carbonyl)-alaninate (6i):** Yield 88%; Mp 104-106 °C; Off white solid; IR (ATR,  $\nu_{\text{max}}$ , cm<sup>-1</sup>): 2928 and 2863 (C-H), 1738 (C=O of ester), 1642 (C=O of amide), 1614 (C=N), 1532 (C=C), 1159 (C-O), 781 (C-C-Cl); <sup>1</sup>H NMR (400 MHz, CDCl<sub>3</sub>,  $\delta$  ppm): 8.27 (s, 1H, Ar-H), 7.86 (d, 1H, Ar-H,  $J = 8.0$  Hz), 7.70 (d, 1H, Ar-H,  $J = 8.0$  Hz), 7.47-7.51 (m, 1H, Ar-H), 7.37-7.39 (m, 1H, Ar-H), 7.17 (t, 1H, Ar-H,  $J = 8.0$  Hz), 6.90 (bs, 1H, amide N-H), 4.83-4.86 (m, 1H, chiral CH), 3.83-3.87 (m, 1H, N-CH), 3.79 (s, 3H, OCH<sub>3</sub>), 1.91-2.18 (m, 6H, cyclohexyl), 1.55 (d, 3H, CH<sub>3</sub>,  $J = 8.0$  Hz), 1.27-1.31 (m, 4H, cyclohexyl); <sup>13</sup>C NMR (100 MHz, CDCl<sub>3</sub>,  $\delta$  ppm): 173.7, 167.2, 161.5 (d,  $^1J_{\text{F-C}} = 250$  Hz), 146.7, 143.6, 136.1, 135.7, 132.4 (d,  $^3J_{\text{F-C}} = 10$  Hz), 128.2, 125.6, 122.3, 119.4, 114.4 (d,  $^2J_{\text{F-C}} = 21$  Hz), 112.4, 58.0, 52.5, 48.6, 31.5, 25.9, 25.1, 18.6; ESI-MS ( $m/z$ ): 458.2 [M+H]<sup>+</sup>, 460.2 [M+2+H]<sup>+</sup>; Anal. calcd. for C<sub>24</sub>H<sub>25</sub>N<sub>3</sub>ClFO<sub>3</sub>: C, 62.95; H, 5.50; N, 9.18. Found: C, 62.92; H, 5.48; N, 9.15.

**Methyl (S)-(2-(2-chloro-6-fluorophenyl)-1-cyclohexyl-1H-benzo[d]imidazole-5-carbonyl)-valinate (6j):** Yield 86%; Mp 58-60 °C; Off white solid; IR (ATR,  $\nu_{\text{max}}$ , cm<sup>-1</sup>): 3362 (O-H), 3073 (Ar-H), 2947 and 2861 (C-H), 1724 (C=O of ester), 1644 (C=O of amide), 1621 (C=N), 1574 (C=C), 1297 (C-O), 1246 (C-F); <sup>1</sup>H NMR (400 MHz, CDCl<sub>3</sub>,  $\delta$  ppm): 8.61 (d, 1H, amide N-H,  $J = 8.0$  Hz), 8.34 (s, 1H, Ar-H), 7.97 (d, 1H, Ar-H,  $J = 8.4$  Hz), 7.87 (d, 1H, Ar-H,  $J = 8.8$  Hz), 7.71-7.77 (m, 1H, Ar-H), 7.62 (m, 1H, Ar-H), 7.49-7.54 (m, 1H, Ar-H), 4.29-4.32 (m, 1H, chiral CH), 4.26-4.28 (m, 1H, N-CH), 3.79 (s, 3H, OCH<sub>3</sub>), 2.25-2.33 (m, 2H, cyclohexyl), 2.20-2.25 (m, 1H, C-H of isopropyl), 1.84-1.90 (m, 4H, cyclohexyl), 1.63-1.66 (m, 1H, cyclohexyl), 1.24-1.41 (m, 3H, cyclohexyl), 0.97-1.01 (m, 6H, diastereotopic CH<sub>3</sub>); <sup>13</sup>C NMR

(100 MHz, CDCl<sub>3</sub>,  $\delta$  ppm): 174.4, 166.4, 161.4 (d,  $^1J_{F-C}$  = 254 Hz), 146.8, 143.7, 136.1 (d,  $^3J_{F-C}$  = 8 Hz), 135.0, 132.7, 125.6 (d,  $^4J_{F-C}$  = 3 Hz), 124.5, 122.9, 119.3, 114.4 (d,  $^2J_{F-C}$  = 21 Hz), 112.4, 58.7, 56.6, 52.4, 30.5, 29.6, 25.5, 24.4, 19.4, 18.9; ESI-MS ( $m/z$ ): 486.4 [M+H]<sup>+</sup>, 488.4 [M+2+H]<sup>+</sup>; Anal. calcd. for C<sub>26</sub>H<sub>29</sub>N<sub>3</sub>ClFO<sub>3</sub>: C, 64.26; H, 6.02; N, 8.65. Found: C, 64.20; H, 5.99; N, 8.61.

**Methyl (S)-(2-(2-chloro-6-fluorophenyl)-1-cyclohexyl-1H-benzof[d]imidazole-5-carbonyl)-leucinate (6k):** Yield 96%; Mp 54-56 °C; Off white solid; IR (ATR,  $\nu_{max}$ , cm<sup>-1</sup>): 3355 (O-H), 3080 (Ar-H), 2948 and 2864 (C-H), 1722 (C=O of ester), 1643 (C=O of amide), 1620 (C=N), 1571 (C=C), 1299 (C-O), 1249 (C-F); <sup>1</sup>H NMR (400 MHz, CDCl<sub>3</sub>,  $\delta$  ppm): 12.51 (s, 1H, CO<sub>2</sub>H), 8.61 (d, 1H, amide N-H,  $J$  = 8.0 Hz), 8.34 (s, 1H, Ar-H), 7.97 (d, 1H, Ar-H,  $J$  = 8.4 Hz), 7.87 (d, 1H, Ar-H,  $J$  = 8.8 Hz), 7.71-7.77 (m, 1H, Ar-H), 7.62 (m, 1H, Ar-H), 7.49-7.54 (m, 1H, Ar-H), 4.47-4.51 (m, 1H, chiral C-H), 3.84-3.90 (m, 1H, N-CH), 3.79 (s, 3H, OCH<sub>3</sub>), 2.12-2.21 (m, 2H, cyclohexyl), 1.60-1.84 (m, 8H, cyclohexyl, isobutyl CH and diastereotopic CH<sub>2</sub>), 1.24-1.29 (m, 3H, cyclohexyl), 0.94 (d, 3H, diastereotopic CH<sub>3</sub>,  $J$  = 6.4 Hz), 0.90 (d, 3H, diastereotopic CH<sub>3</sub>,  $J$  = 6.4 Hz); <sup>13</sup>C NMR (100 MHz, CDCl<sub>3</sub>,  $\delta$  ppm): 174.4, 166.4, 161.6 (d,  $^1J_{F-C}$  = 230 Hz), 146.8, 143.7, 136.5, 135.3, 132.3 (d,  $^3J_{F-C}$  = 10 Hz), 125.5, 124.5, 124.0, 122.9, 119.4, 114.4 (d,  $^2J_{F-C}$  = 20 Hz), 111.9, 56.6, 50.9, 52.1, 48.6, 30.5, 25.5, 24.6, 24.3, 23.1, 21.6; ESI-MS ( $m/z$ ): 500.2 [M+H]<sup>+</sup>, 502.2 [M+2+H]<sup>+</sup>; Anal. calcd. for C<sub>27</sub>H<sub>31</sub>N<sub>3</sub>ClFO<sub>3</sub>: C, 64.86; H, 6.25; N, 8.40. Found: C, 64.85; H, 6.23; N, 8.42.

**Methyl (S)-(2-(2-chloro-6-fluorophenyl)-1-cyclohexyl-1H-benzof[d]imidazole-5-carbonyl)-tryptophanate (6l):** Yield 97%; Mp 84-86 °C; Off white solid; FT IR (ATR,  $\nu_{max}$ , cm<sup>-1</sup>): 3409 (N-H), 3056 (Ar-H), 2937 and 2858 (C-H), 1724 (C=O of ester), 1641 (C=O of amide), 1620 (C=N), 1573 (C=C), 1299 (C-O), 1251 (C-F); <sup>1</sup>H NMR (400 MHz, CDCl<sub>3</sub>,  $\delta$  ppm): 10.80 (s, 1H, indole-NH), 8.67 (d, 1H, amide N-H,  $J$  = 7.6 Hz), 8.27 (s, 1H, Ar-H), 7.95 (d, 1H, Ar-H,  $J$  = 8.4 Hz), 7.71-7.80 (m, 2H, Ar-H), 7.60-7.63 (m, 2H, Ar-H), 7.49-7.53 (m, 1H, Ar-H), 7.32 (d, 1H, Ar-H,  $J$  = 8.0 Hz), 7.23 (s, 1H, Ar-H), 7.04-7.08 (m, 1H, Ar-H), 6.98-7.01 (m, 1H, Ar-H), 4.67-4.72 (m, 1H, chiral C-H), 3.83-3.89 (m, 1H, N-CH), 3.79 (s, 3H, OCH<sub>3</sub>), 3.22-3.28 (m, 2H, indolyl CH<sub>2</sub>), 2.07-2.18 (m, 2H, cyclohexyl), 1.79-1.90 (m, 4H, cyclohexyl), 1.59-1.61 (m, 1H, cyclohexyl), 1.17-1.28 (m, 3H, cyclohexyl); <sup>13</sup>C NMR (100 MHz, CDCl<sub>3</sub>,  $\delta$  ppm): 173.6, 166.6, 160.7 (d,  $^1J_{F-C}$  = 240 Hz), 145.8, 142.8, 136.2, 135.1, 134.8, 133.6, 128.1, 127.2, 125.9, 123.6, 122.5, 120.9, 119.2, 118.4, 118.1, 114.9, 112.3, 111.5, 110.5, 57.2, 53.9, 52.2, 30.8, 26.6, 25.3, 24.3; ESI-MS ( $m/z$ ): 573.3 [M+H]<sup>+</sup>, 575.3 [M+2+H]<sup>+</sup>; Anal. calcd. for C<sub>32</sub>H<sub>30</sub>N<sub>4</sub>ClFO<sub>3</sub>: C, 67.07; H, 5.28; N, 9.78. Found: C, 67.05; H, 5.27; N, 9.76.

### Procedure for the synthesis of benzimidazole monopeptides (7a-l)

To a stirred clear solution of **6a-l** (0.01 mol) in 20 mL of THF:water (2:1) mixture, LiOH.H<sub>2</sub>O (0.015 mol, 1.5 equiv.) was added at 0 °C. The stirring was continued at this temperature for 4 h. After completion of the reaction (monitored by TLC, hexane: ethyl acetate (4:6, v/v)), the reaction mass was quenched to crushed ice, acidified with dilute HCl. The resulting solid was washed with water and dried. The solid was subjected to column chromatography using 10-50% of ethyl acetate in hexane to obtain pure benzimidazole monopeptides.

#### **(S)-(1-Cyclohexyl-2-(4-methoxyphenyl)-1H-benzo[d]imidazole-5-carbonyl)alanine (7a):**

Yield 71%; Mp 278-280 °C; Off white solid; FT IR (ATR,  $\nu_{\max}$ , cm<sup>-1</sup>): 3406 (O-H), 3078 (Ar-H), 2935 and 2854 (C-H), 1716 (C=O of acid), 1654 (C=O of amide), 1612 (C=N), 1577 (C=C), 1029 (C-O); <sup>1</sup>H NMR (400 MHz, DMSO-*d*<sub>6</sub>,  $\delta$  ppm): 12.44 (s, 1H, CO<sub>2</sub>H), 8.65 (d, 1H, amide N-H, *J* = 7.2 Hz), 8.27 (d, 1H, Ar-H, *J* = 1.2 Hz), 7.90 (d, 1H, Ar-H, *J* = 8.4 Hz), 7.80 (dd, 1H, Ar-H, *J* = 1.6 Hz, 7.2 Hz), 7.61 (d, 1H, Ar-H, *J* = 8.8 Hz), 7.15 (d, 1H, Ar-H, *J* = 9.2 Hz), 4.42-4.49 (m, 1H, chiral CH), 4.26-4.32 (m, 1H, N-CH), 3.86 (s, 3H, OCH<sub>3</sub>), 2.25-2.33 (m, 2H, cyclohexyl), 1.84-1.92 (m, 4H, cyclohexyl), 1.63-1.66 (m, 1H, cyclohexyl), 1.42-1.44 (d, 3H, CH<sub>3</sub>, *J* = 7.2 Hz), 1.23-1.39 (m, 3H, cyclohexyl); <sup>13</sup>C NMR (100 MHz, DMSO-*d*<sub>6</sub>,  $\delta$  ppm): 174.4, 166.4, 160.4, 154.7, 142.8, 135.7, 130.8, 127.5, 122.5, 121.6, 118.7, 114.2, 112.4, 56.7, 55.3, 48.2, 30.5, 25.5, 24.4, 16.9; ESI-MS (*m/z*): 422.4 [M+H]<sup>+</sup>; Anal. calcd. for C<sub>24</sub>H<sub>27</sub>N<sub>3</sub>O<sub>4</sub>: C, 68.39; H, 6.46; N, 9.97. Found: C, 68.35; H, 6.47; N, 9.94.

#### **(S)-(1-Cyclohexyl-2-(4-methoxyphenyl)-1H-benzo[d]imidazole-5-carbonyl)valine (7b):**

Yield 50%; Mp 194-196 °C; Off white solid; FT IR (ATR,  $\nu_{\max}$ , cm<sup>-1</sup>): 3409 (O-H), 3379 and 3409 (NH), 3100 (Ar-H), 2935 and 2850 (C-H), 1712 (C=O of acid), 1650 (C=O of amide), 1612 (C=N), 1581 (C=C), 1029 (C-O); <sup>1</sup>H NMR (400 MHz, DMSO-*d*<sub>6</sub>,  $\delta$  ppm): 8.33 (d, 1H, amide NH, *J* = 8.0 Hz); 8.27 (d, 1H, Ar-H, *J* = 1.2 Hz), 7.89 (d, 1H, Ar-H, *J* = 8.8 Hz), 7.79 (dd, 1H, Ar-H, *J* = 1.6 Hz, 8.4 Hz), 7.61 (d, 2H, Ar-H, *J* = 8.8 Hz), 7.15 (d, 2H, Ar-H, *J* = 8.8 Hz), 4.26-4.32 (m, 2H, N-CH and chiral CH), 3.86 (s, 3H, OCH<sub>3</sub>), 2.19-2.33 (m, 3H, CH and cyclohexyl), 1.84-1.90 (m, 4H, cyclohexyl), 1.63-1.66 (m, 1H, cyclohexyl), 1.23-1.41 (m, 3H, cyclohexyl), 0.97-1.01 (m, 6H, diastereotopic CH<sub>3</sub>); <sup>13</sup>C NMR (100 MHz, DMSO-*d*<sub>6</sub>,  $\delta$  ppm): 174.3, 166.9, 160.4, 154.6, 142.7, 135.7, 130.8, 127.8, 122.5, 121.7, 118.8, 114.2, 112.4, 58.6, 56.7, 55.3, 30.5, 29.6, 25.5, 24.4, 19.4, 18.8; ESI-MS (*m/z*): 450.4 [M+H]<sup>+</sup>; Anal. calcd. for C<sub>26</sub>H<sub>31</sub>N<sub>3</sub>O<sub>4</sub>: C, 69.47; H, 6.95; N, 9.35. Found: C, 69.45; H, 6.92; N, 9.37.

**(S)-(1-Cyclohexyl-2-(4-methoxyphenyl)-1H-benzof[d]imidazole-5-carbonyl)leucine (7c):**

Yield 66%; Mp: 224-226 °C; Off white solid; FT IR (ATR,  $\nu_{\max}$ ,  $\text{cm}^{-1}$ ): 3413 (O-H), 3074 (Ar-H), 2935 and 2862 (C-H), 1712 (C=O of acid), 1650 (C=O of amide), 1612 (C=N), 1577 (C=C), 1029 (C-O);  $^1\text{H}$  NMR (400 MHz, DMSO- $d_6$ ,  $\delta$  ppm): 8.33 (d, 1H, amide NH,  $J = 6.8$  Hz), 8.23 (s, 1H, Ar-H), 7.88 (d, 1H, Ar-H,  $J = 8.4$  Hz), 7.78 (d, 1H, Ar-H,  $J = 8.4$  Hz), 7.60 (d, 1H, Ar-H,  $J = 8.4$  Hz), 7.14 (d, 1H, Ar-H,  $J = 8.8$  Hz), 4.37-4.40 (m, 1H, chiral CH), 4.25-4.31 (m, 1H, C-NH), 3.86 (s, 3H, OCH<sub>3</sub>), 2.24-2.33 (m, 2H, cyclohexyl), 1.83-1.90 (m, 4H, cyclohexyl), 1.62-1.76 (m, 4H, isobutyl CH, CH<sub>2</sub> and cyclohexyl), 1.24-1.41 (m, 3H, cyclohexyl), 0.89-0.92 (m, 6H, diastereotopic CH<sub>3</sub>);  $^{13}\text{C}$  NMR (100 MHz, DMSO- $d_6$ ,  $\delta$  ppm): 174.4, 166.4, 160.4, 154.6, 142.8, 135.6, 130.8, 128.0, 122.5, 121.5, 118.6, 114.2, 112.4, 56.6, 55.3, 30.5, 29.6, 25.5, 24.6, 23.0, 21.6, 18.9; ESI-MS ( $m/z$ ): 464.4 [M+H]<sup>+</sup>; Anal. calcd. for C<sub>27</sub>H<sub>33</sub>N<sub>3</sub>O<sub>4</sub>: C, 69.95; H, 7.18; N, 9.06. Found: C, 69.96; H, 7.15; N, 9.04.

**(S)-(1-Cyclohexyl-2-(4-methoxyphenyl)-1H-benzof[d]imidazole-5-carbonyl)tryptophan (7d):**

Yield 99%, Mp: 172-174 °C; Off white to pale brown solid; FT IR (ATR,  $\nu_{\max}$ ,  $\text{cm}^{-1}$ ): 3406 (O-H), 3055 (Ar-H), 2933 and 2856 (C-H), 1720 (C=O of acid), 1643 (C=O of amide), 1612 (C=N), 1577 (C=C), 1178 (C-O);  $^1\text{H}$  NMR (400 MHz, DMSO- $d_6$ ,  $\delta$  ppm): 10.81 (s, 1H, indole NH), 8.62 (d, 1H, amide NH,  $J = 7.6$  Hz), 8.20 (d, 1H, Ar-H,  $J = 1.6$  Hz), 7.88 (d, 1H, Ar-H,  $J = 8.4$  Hz), 7.73 (dd, 1H, Ar-H,  $J = 8.4$  Hz, 1.6 Hz), 7.59-7.63 (m, 3H, Ar-H), 7.32 (d, 1H, Ar-H,  $J = 8.0$  Hz), 7.23 (d, 1H, Ar-H,  $J = 2.0$  Hz), 7.15 (d, 2H, Ar-H,  $J = 8.8$  Hz), 7.04-7.08 (m, 1H, Ar-H), 6.97-7.01 (m, 1H, Ar-H), 4.66-4.72 (m, 1H, chiral CH), 4.25-4.31 (m, 1H, C-NH), 3.86 (s, 3H, OCH<sub>3</sub>), 2.23-2.29 (m, 2H, cyclohexyl), 1.83-1.89 (m, 4H, cyclohexyl), 1.62-1.65 (m, 1H, cyclohexyl), 1.25-1.41 (m, 3H, cyclohexyl);  $^{13}\text{C}$  NMR (100 MHz, DMSO- $d_6$ ,  $\delta$  ppm): 173.7, 166.6, 160.4, 154.6, 142.6, 136.1, 135.6, 130.9, 127.6, 127.1, 125.76, 123.6, 121.6, 120.9, 118.5, 118.4, 118.1, 114.2, 112.5, 111.4, 110.5, 56.7, 55.3, 53.7, 30.5, 26.6, 25.5, 24.3; ESI-MS ( $m/z$ ): 537.5 [M+H]<sup>+</sup>; Anal. calcd. for C<sub>32</sub>H<sub>32</sub>N<sub>4</sub>O<sub>4</sub>: C, 71.62; H, 6.01; N, 10.44. Found: C, 71.59; H, 6.02; N, 10.41.

**(S)-(1-Cyclohexyl-2-(4-fluorophenyl)-1H-benzof[d]imidazole-5-carbonyl)alanine (7e):**

Yield 75%; Mp 272-274 °C; Off white solid; IR (ATR,  $\nu_{\max}$ ,  $\text{cm}^{-1}$ ): 3411 (O-H), 3071 (Ar-H), 2932 and 2861 (C-H), 1706 (C=O of acid), 1653 (C=O of amide), 1614 (C=N), 1578 (C=C), 1265 (C-O), 1230 (C-F);  $^1\text{H}$  NMR (400 MHz, DMSO- $d_6$ ,  $\delta$  ppm): 8.63 (d, 1H, amide N-H,  $J = 7.2$  Hz), 8.29 (s, 1H, Ar-H), 7.93 (d, 1H, Ar-H,  $J = 8.8$  Hz), 7.83 (d, 1H, Ar-H,  $J = 8.8$  Hz), 7.71-7.75 (m, 2H, Ar-H), 7.42-7.46 (m, 2H, Ar-H), 4.41-4.48 (m, 1H, chiral CH), 4.20-4.26 (m, 1H, N-CH), 2.24-2.32 (m, 2H, cyclohexyl), 1.83-1.93 (m, 4H, cyclohexyl), 1.63-1.66 (m, 1H,

cyclohexyl), 1.42-1.44 (d, 3H, CH<sub>3</sub>,  $J = 7.2$  Hz), 1.23-1.38 (m, 3H, cyclohexyl); <sup>13</sup>C NMR (100 MHz, DMSO-*d*<sub>6</sub>,  $\delta$  ppm): 174.5, 165.2 (d,  $^1J_{\text{F-C}} = 213.8$  Hz), 161.7, 153.7, 142.7, 135.7, 131.8 (d,  $^3J_{\text{F-C}} = 8.5$  Hz), 127.7, 126.9, 121.9, 118.9, 115.9 (d,  $^2J_{\text{F-C}} = 21.5$  Hz), 112.6, 56.8, 48.4, 30.5, 25.4, 24.3, 17.1; ESI-MS ( $m/z$ ): 410.4 [M+H]<sup>+</sup>; Anal. calcd. for C<sub>23</sub>H<sub>24</sub>N<sub>3</sub>FO<sub>3</sub>: C, 67.47; H, 5.91; N, 10.26. Found: C, 67.43; H, 5.88; N, 10.27.

**(S)-(1-Cyclohexyl-2-(4-fluorophenyl)-1H-benzod[*j*]imidazole-5-carbonyl)valine (7f):** Yield 89%; 262-264 °C; Off white solid; IR (ATR,  $\nu_{\text{max}}$ , cm<sup>-1</sup>): 3407 (O-H), 3074 (Ar-H), 2935 and 2864 (C-H), 1706 (C=O of acid), 1654 (C=O of amide), 1614 (C=N), 1581 (C=C), 1265 (C-O), 1232 (C-F); <sup>1</sup>H NMR (400 MHz, DMSO-*d*<sub>6</sub>,  $\delta$  ppm): 8.29 (d, 1H, amide N-H,  $J = 10.4$  Hz), 8.25 (d, 1H, Ar-H,  $J = 1.6$  Hz), 7.92 (d, 1H, Ar-H,  $J = 11.6$  Hz), 7.78-7.82 (m, 3H, Ar-H), 7.41-7.46 (m, 2H, Ar-H), 4.22-4.27 (m, 2H, chiral CH and N-CH), 2.18-2.28 (m, 3H, cyclohexyl), 1.81-1.90 (m, 4H, cyclohexyl), 1.63-1.66 (m, 1H, cyclohexyl), 1.24-1.32 (m, 3H, cyclohexyl), 0.97-1.01 (m, 6H, diastereotopic CH<sub>3</sub>); <sup>13</sup>C NMR (100 MHz, DMSO-*d*<sub>6</sub>,  $\delta$  ppm): 173.9, 167.4, 162.9 (d,  $^1J_{\text{F-C}} = 250$  Hz), 154.2, 142.9, 136.03, 132.3 (d,  $^3J_{\text{F-C}} = 12$  Hz), 128.6, 127.2, 122.4, 119.4, 116.4 (d,  $^2J_{\text{F-C}} = 29$  Hz), 113.2, 59.33, 57.3, 30.9, 30.3, 25.9, 24.8, 19.9, 19.3; ESI-MS ( $m/z$ ): 438.4 [M+H]<sup>+</sup>; Anal. calcd. for C<sub>25</sub>H<sub>28</sub>N<sub>3</sub>FO<sub>3</sub>: C, 68.63; H, 6.45; N, 9.60. Found: C, 68.65; H, 6.44; N, 9.62.

**(S)-(1-Cyclohexyl-2-(4-fluorophenyl)-1H-benzod[*j*]imidazole-5-carbonyl)leucine (7g):** Yield 90%, 244-248 °C; Off white solid; IR (ATR,  $\nu_{\text{max}}$ , cm<sup>-1</sup>): 3409 (O-H), 3071 (Ar-H), 2934 and 2865 (C-H), 1707 (C=O of acid), 1654 (C=O of amide), 1614 (C=N), 1579 (C=C), 1265 (C-O), 1231 (C-F); <sup>1</sup>H NMR (400 MHz, DMSO-*d*<sub>6</sub>,  $\delta$  ppm): 8.59 (d, 1H, amide N-H,  $J = 7.6$  Hz), 8.3 (s, 1H, Ar-H), 7.93 (d, 1H, Ar-H,  $J = 8.4$  Hz), 7.84 (d, 1H, Ar-H,  $J = 8.4$  Hz), 7.72-7.75 (m, 2H, Ar-H), 7.42-7.46 (m, 2H, Ar-H), 4.47-4.52 (m, 1H, chiral CH), 4.20-4.26 (m, 1H, N-CH), 2.24-2.32 (m, 2H, cyclohexyl), 1.59-1.92 (m, 8H, cyclohexyl, isobutyl CH and diastereotopic CH<sub>2</sub>), 1.23-1.41 (m, 3H, cyclohexyl), 0.95 (d, 3H, diastereotopic CH<sub>3</sub>,  $J = 6.4$  Hz) 0.91 (d, 3H, diastereotopic CH<sub>3</sub>,  $J = 6.4$  Hz); <sup>13</sup>C NMR (100 MHz, DMSO-*d*<sub>6</sub>,  $\delta$  ppm): 174.4, 166.7, 162.9 (d,  $^1J_{\text{F-C}} = 246.7$  Hz), 153.7, 142.6, 135.6, 131.8 (d,  $^3J_{\text{F-C}} = 8.6$  Hz), 127.7, 126.8, 121.9, 118.9, 115.8 (d,  $^2J_{\text{F-C}} = 21.7$  Hz), 112.6, 56.8, 50.9, 30.5, 25.4, 24.6, 24.3, 22.9, 21.2; ESI-MS ( $m/z$ ): 450.4 [M-H]<sup>-</sup>; Anal. calcd. for C<sub>26</sub>H<sub>30</sub>N<sub>3</sub>FO<sub>3</sub>: C, 69.16; H, 6.70; N, 9.31. Found: C, 69.14; H, 6.73; N, 9.34.

**(S)-(1-Cyclohexyl-2-(4-fluorophenyl)-1H-benzod[*j*]imidazole-5-carbonyl)tryptophan (7h):** Yield 91%; Mp 164-166 °C; Off white solid; FT IR (ATR,  $\nu_{\text{max}}$ , cm<sup>-1</sup>): 3409 (O-H), 3056

(Ar-H), 2933 and 2858 (C-H), 1720 (C=O of acid), 1641 (C=O of amide), 1614 (C=N), 1527 (C=C), 1296 (C-O), 1230 (C-F); <sup>1</sup>H NMR (400 MHz, DMSO-*d*<sub>6</sub>,  $\delta$  ppm): 10.79 (s, 1H, indole-NH), 8.66 (d, 1H, amide-NH,  $J = 10$  Hz), 8.20 (d, 1H, Ar-H,  $J = 1.2$  Hz), 7.90 (d, 1H, Ar-H,  $J = 11.6$  Hz), 7.69-7.76 (m, 3H, Ar-H), 7.61 (d, 1H, Ar-H,  $J = 10.4$  Hz), 7.43 (t, 2H, Ar-H,  $J = 12$  Hz), 7.32 (d, 1H, Ar-H,  $J = 10.4$  Hz), 7.23 (d, 1H, Ar-H,  $J = 2.4$  Hz), 6.99-7.06 (m, 2H, Ar-H); 4.64-4.68 (m, 1H, chiral C-H), 4.16-4.24 (m, 1H, -NC-H), 3.25-3.32 (m, 2H, indole CH<sub>2</sub>), 2.23-2.27 (m, 2H, cyclohexyl), 1.81-1.91 (m, 4H, cyclohexyl), 1.62-1.65 (m, 1H, cyclohexyl), 1.26-1.40 (m, 3H, cyclohexyl); <sup>13</sup>C NMR (100 MHz, DMSO-*d*<sub>6</sub>,  $\delta$  ppm): 174.3, 167.2, 162.9 (d, <sup>1</sup> $J_{F-C} = 250$  Hz), 154.3, 142.9, 136.5, 136.1, 132.3 (d, <sup>3</sup> $J_{F-C} = 11$  Hz), 128.2, 127.6, 124.1, 123.5, 121.5, 119.3, 118.9, 118.6, 118.2, 116.4 (d, <sup>2</sup> $J_{F-C} = 29$  Hz), 113.2, 111.9, 110.9, 57.3, 54.3, 30.9, 27.1, 25.9, 24.8; ESI-MS ( $m/z$ ): 524.22 [M+H]<sup>+</sup>; Anal. calcd. for C<sub>31</sub>H<sub>29</sub>N<sub>4</sub>FO<sub>3</sub>: C, 70.98; H, 5.57; N, 10.68. Found: C, 70.95; H, 5.58; N, 10.66.

**(S)-(2-(2-Chloro-6-fluorophenyl)-1-cyclohexyl-1H-benzo[d]imidazole-5-carbonyl)alanine**

**(7i)**: Yield 70%; Mp 248-250 °C; Off white solid; IR (ATR,  $\nu_{\max}$ , cm<sup>-1</sup>): 3372 (O-H), 3078 (Ar-H), 2948 and 2862 (C-H), 1721 (C=O of acid), 1642 (C=O of amide), 1620 (C=N), 1576 (C=C), 1296 (C-O), 1247 (C-F); <sup>1</sup>H NMR (400 MHz, DMSO-*d*<sub>6</sub>,  $\delta$  ppm): 8.61 (d, 1H, amide N-H,  $J = 8.0$  Hz), 8.34 (s, 1H, Ar-H), 7.97 (d, 1H, Ar-H,  $J = 8.4$  Hz), 7.87 (d, 1H, Ar-H,  $J = 8.8$  Hz), 7.71-7.77 (m, 1H, Ar-H), 7.62 (m, 1H, Ar-H), 7.49-7.54 (m, 1H, Ar-H), 4.63-4.68 (m, 1H, chiral CH), 4.19-4.25 (m, 1H, N-CH), 2.22-2.31 (m, 2H, cyclohexyl), 1.82-1.92 (m, 4H, cyclohexyl), 1.62-1.65 (m, 1H, cyclohexyl), 1.42-1.44 (d, 3H, CH<sub>3</sub>,  $J = 7.2$  Hz), 1.26-1.40 (m, 3H, cyclohexyl); <sup>13</sup>C NMR (100 MHz, DMSO-*d*<sub>6</sub>,  $\delta$  ppm): 175.8, 166.2, 161.1 (d, <sup>1</sup> $J_{F-C} = 251$  Hz), 145.7, 141.7, 135.8, 134.6, 132.3 (d, <sup>3</sup> $J_{F-C} = 10$  Hz), 128.8, 125.3, 125.3, 123.3, 118.9 (d, <sup>2</sup> $J_{F-C} = 20$  Hz), 114.5 (d, <sup>2</sup> $J_{F-C} = 12$  Hz), 112.2, 58.0, 48.8, 31.1, 30.1, 25.6, 18.5; ESI-MS ( $m/z$ ): 444.4 [M+H]<sup>+</sup>, 446.4 [M+2+H]<sup>+</sup>; Anal. calcd. for C<sub>23</sub>H<sub>23</sub>N<sub>3</sub>ClFO<sub>3</sub>: C, 62.23; H, 5.22; N, 9.47. Found: C, 62.25; H, 5.21; N, 9.45.

**(S)-(2-(2-Chloro-6-fluorophenyl)-1-cyclohexyl-1H-benzo[d]imidazole-5-carbonyl)valine**

**(7j)**: Yield 81%; Mp 88-90 °C; Off white solid; IR (ATR,  $\nu_{\max}$ , cm<sup>-1</sup>): 3362 (O-H), 3073 (Ar-H), 2947 and 2861 (C-H), 1724 (C=O of acid), 1644 (C=O of amide), 1621 (C=N), 1574 (C=C), 1297 (C-O), 1246 (C-F); <sup>1</sup>H NMR (400 MHz, CDCl<sub>3</sub>,  $\delta$  ppm): 8.94 (m, 1H, amide N-H), 8.00 (d, 1H, Ar-H,  $J = 8.0$  Hz), 7.74 (d, 1H, Ar-H,  $J = 8.0$  Hz), 7.54-7.56 (m, 2H, Ar-H), 7.42 (d, 1H, Ar-H,  $J = 8.0$  Hz), 7.21 (t, 1H, Ar-H,  $J = 8.0$  Hz), 4.70-4.74 (m, 1H, chiral CH), 3.83-3.86 (m, 1H, N-CH), 2.20-2.40 (m, 1H, C-H of isopropyl), 2.17-2.21 (m, 2H, cyclohexyl), 1.91-2.16 (m, 4H, cyclohexyl), 1.20-1.30 (m, 4H, cyclohexyl), 1.0-1.03 (m, 6H, diastereotopic CH<sub>3</sub>); <sup>13</sup>C

NMR (100 MHz, CDCl<sub>3</sub>,  $\delta$  ppm): 174.4, 166.4, 161.4 (d,  $^1J_{F-C}$  = 254 Hz), 146.0, 142.4, 136.1, 135.0, 129.2 (d,  $^3J_{F-C}$  = 8 Hz), 125.7, 123.4, 119.3, 115.1, 114.4 (d,  $^2J_{F-C}$  = 21 Hz), 112.4, 60.4, 58.1, 31.6, 29.4, 25.8, 22.7, 21.0, 18.9; ESI-MS ( $m/z$ ): 472.4 [M+H]<sup>+</sup>, 474.4 [M+2+H]<sup>+</sup>; Anal. calcd. for C<sub>25</sub>H<sub>27</sub>N<sub>3</sub>ClFO<sub>3</sub>: C, 63.62; H, 5.77; N, 8.90. Found: C, 63.60; H, 5.74; N, 8.91.

**(S)-(2-(2-Chloro-6-fluorophenyl)-1-cyclohexyl-1H-benzo[d]imidazole-5-carbonyl)leucine (7k)**: Yield 98%; Mp 124-126 °C; Off white solid; IR (ATR,  $\nu_{\max}$ , cm<sup>-1</sup>): 3355 (O-H), 3080 (Ar-H), 2948 and 2864 (C-H), 1722 (C=O of acid), 1643 (C=O of amide), 1620 (C=N), 1571 (C=C), 1299 (C-O), 1249 (C-F); <sup>1</sup>H NMR (400 MHz, DMSO-*d*<sub>6</sub>,  $\delta$  ppm): 12.51 (s, 1H, CO<sub>2</sub>H), 8.43 (d, 1H, amide N-H,  $J$  = 10.0 Hz), 8.28 (s, 1H, Ar-H), 7.96 (d, 1H, Ar-H,  $J$  = 11.6 Hz), 7.85 (d, 1H, Ar-H,  $J$  = 11.2 Hz), 7.69-7.74 (m, 1H, Ar-H), 7.59-7.61 (m, 1H, Ar-H), 7.47-7.53 (m, 1H, Ar-H), 4.41 (m, 1H, chiral C-H), 2.10-2.19 (m, 2H, cyclohexyl), 1.64-1.89 (m, 8H, cyclohexyl, isobutyl CH and diastereotopic CH<sub>2</sub>), 1.58-1.60 (m, 5H, cyclohexyl), 1.21-1.24 (m, 6H, diastereotopic CH<sub>3</sub>); <sup>13</sup>C NMR (100 MHz, DMSO-*d*<sub>6</sub>,  $\delta$  ppm): 175.1, 166.8, 161.6 (d,  $^1J_{F-C}$  = 230 Hz), 146.3, 143.3, 135.4, 135.2, 134.2, 128.9, 126.4, 122.8, 119.5, 119.0 (d,  $^2J_{F-C}$  = 26 Hz), 115.5 (d,  $^2J_{F-C}$  = 29 Hz), 112.9, 57.7, 52.3, 31.2, 25.8, 25.1, 24.7, 23.5, 21.9; ESI-MS ( $m/z$ ): 485.4 [M+H]<sup>+</sup>, 487.4 [M+2+H]<sup>+</sup>; Anal. calcd. for C<sub>26</sub>H<sub>29</sub>N<sub>3</sub>ClFO<sub>3</sub>: C, 64.26; H, 6.01; N, 8.65. Found: C, 64.25; H, 6.03; N, 8.66.

**(S)-(2-(2-Chloro-6-fluorophenyl)-1-cyclohexyl-1H-benzo[d]imidazole-5-carbonyl)tryptophan (7l)**: Yield 97%; Mp 182-184 °C; Off white solid; FT IR (ATR,  $\nu_{\max}$ , cm<sup>-1</sup>): 3409 (O-H), 3056 (Ar-H), 2937 and 2858 (C-H), 1724 (C=O of acid), 1641 (C=O of amide), 1620 (C=N), 1573 (C=C), 1299 (C-O), 1251 (C-F); <sup>1</sup>H NMR (400 MHz, DMSO-*d*<sub>6</sub>,  $\delta$  ppm): 10.80 (s, 1H, indole-NH), 8.67 (d, 1H, amide N-H,  $J$  = 7.6 Hz), 8.27 (s, 1H, Ar-H), 7.95 (d, 1H, Ar-H,  $J$  = 8.4 Hz), 7.71-7.80 (m, 2H, Ar-H), 7.60-7.63 (m, 2H, Ar-H), 7.49-7.53 (m, 1H, Ar-H), 7.32 (d, 1H, Ar-H,  $J$  = 8.0 Hz), 7.23 (s, 1H, Ar-H), 7.04-7.08 (m, 1H, Ar-H), 6.98-7.01 (m, 1H, Ar-H), 4.67-4.72 (m, 1H, chiral C-H), 3.83-3.89 (m, 1H, N-CH), 3.22-3.28 (m, 2H, indolyl CH<sub>2</sub>), 2.07-2.18 (m, 2H, cyclohexyl), 1.79-1.90 (m, 4H, cyclohexyl), 1.59-1.61 (m, 1H, cyclohexyl), 1.17-1.28 (m, 3H, cyclohexyl); <sup>13</sup>C NMR (100 MHz, DMSO-*d*<sub>6</sub>,  $\delta$  ppm): 173.6, 166.6, 160.7 (d,  $^1J_{F-C}$  = 240 Hz), 154.3, 145.8, 142.8, 136.2, 135.1, 134.8, 133.6, 128.1, 127.6, 127.2, 125.9, 123.6, 122.5, 120.9, 119.2, 118.2 (d,  $^2J_{F-C}$  = 25 Hz), 114.9, 112.3, 111.5, 110.5, 57.2, 53.9, 30.8, 26.6, 25.3, 24.3; ESI-MS ( $m/z$ ): 559.3 [M+H]<sup>+</sup>, 561.3 [M+2+H]<sup>+</sup>; Anal. calcd. for C<sub>31</sub>H<sub>28</sub>N<sub>4</sub>ClFO<sub>3</sub>: C, 66.60; H, 5.05; N, 10.02. Found: C, 66.57; H, 5.08; N, 10.01.

**General procedure for the synthesis of 3-aryl-1H-pyrazole-4-carboxaldehydes (10a-c)**

3-Aryl-1*H*-pyrazole-4-carboxaldehydes (**10a-c**) were prepared according to the general procedure described in the literature<sup>11</sup> by means of Vilsmeier-Haack reaction on 2-(1-arylethylidene)hydrazine carboxamides (**9a-c**) which in-turn were prepared by the reaction of substituted acetophenones (**8a-c**) with semicarbazide hydrochloride in acetic acid-sodium acetate buffer. In a typical experiment, to an ice-cold solution of 2-(1-arylethylidene)hydrazine carboxamides (**9a-c**) (10 mmol) in DMF (20 mL), POCl<sub>3</sub> (50 mmol) was added dropwise with stirring at 0 °C. After complete addition, the reaction mass was stirred at room temperature for about 30 min and then at 60-65 °C for 8 h. The reaction mixture was allowed to cool to room temperature and then quenched with crushed ice, followed by neutralization with 25% sodium hydroxide solution. The solid obtained was filtered, washed with water and dried. The crude product was used as such for the next step.

#### **General procedure for the synthesis of 2-(4-oxo-2-thioxothiazolidin-3-yl)amino acids (12a-d)**

2-(4-Oxo-2-thioxothiazolidin-3-yl)amino acids (**12a-d**) were prepared according to the reported procedure.<sup>21</sup> Appropriate amino acid (**11a-d**, 10 mmol) was dissolved in a solution of potassium hydroxide (10 mmol) in water (10 mL). Carbon disulfide (10 mmol) was added dropwise to the above clear solution and stirred at room temperature for 6-12 h. An aqueous solution of potassium chloroacetate (10 mmol) was then added and continued stirring for further 30 min. The reaction mixture was acidified with 2N HCl to pH 3.0 and stirred at 90 °C for 1-3 h. The reaction mixture was poured onto crushed ice and solid obtained was filtered, washed with water, dried and used as such for the next step. Whenever a gummy solid was obtained, it was extracted to ethyl acetate, concentrated *in vacuo* and triturated with hexane to get orange solid.

#### **General procedure for the synthesis of pyrazole conjugated rhodanine carboxylic acids (13a-l)**

β-Alanine (0.02 mol, 2.0 equiv.) was added to a clear solution of pyrazole aldehyde (**10a-c**, 0.01 mol, 1.0 equiv.) and rhodanine amino acid (**12a-d**, 0.01 mol, 1.0 equiv.) in acetic acid (10 mL). Then the reaction mixture was heated to reflux for 16-18 h. After completion of the reaction (monitored by TLC hexane: ethyl acetate (2:1, v/v)), the reaction mass was allowed to cool to room temperature and poured onto crushed ice to get yellow to orange colored solid. The solid separated was filtered, washed with water, dried and subjected to column purification using 10-60 % ethyl acetate in hexane to obtain pure product.

**(S)-2-(5-((3-(4-Methoxyphenyl)-1H-pyrazol-4-yl)methylene)-4-oxo-2-thioxothiazolidin-3-yl)acetic acid (13a):** Yield 60%; Mp 164-166 °C; Red solid; FT IR (ATR,  $\nu_{\max}$ ,  $\text{cm}^{-1}$ ): 3400 (O-H), 3001 (Ar-H), 2933 and 2858 (C-H), 1705 (C=O), 1610 (C=N), 1529 (C=C), 1228 (C=S), 1106 (C-O);  $^1\text{H}$  NMR (400 MHz, DMSO- $d_6$ ,  $\delta$  ppm): 8.05 (s, 1H, pyrazole-5H), 7.53 (s, 1H, =C-H), 7.49 (d, 2H, Ar-H,  $J = 8.4$  Hz), 7.12 (d, 2H, Ar-H,  $J = 8.8$  Hz), 3.57 (s, 2H,  $\text{CH}_2$ );  $^{13}\text{C}$  NMR (100 MHz, DMSO- $d_6$ ,  $\delta$  ppm): 192.1, 169.6, 166.0, 160.1, 130.1, 125.4, 117.4, 114.6, 112.8, 55.3, 43.1; ESI-MS ( $m/z$ ): 374.2 [M-H] $^-$ ; Anal. calcd. for  $\text{C}_{16}\text{H}_{13}\text{N}_3\text{O}_4\text{S}_2$ : C, 51.19; H, 3.49; N, 11.19. Found: C, 51.21; H, 3.46; N, 11.14.

**(S)-2-(5-((3-(4-Methoxyphenyl)-1H-pyrazol-4-yl)methylene)-4-oxo-2-thioxothiazolidin-3-yl)propanoic acid (13b):** Yield 65%; Mp 150-152 °C; Red solid; FT IR (ATR,  $\nu_{\max}$ ,  $\text{cm}^{-1}$ ): 3496 (O-H), 3172 (Ar-H), 2903 and 2856 (C-H), 1709 (C=O), 1608 (C=N), 1516 (C=C), 1247 (C=S), 1111 (C-O);  $^1\text{H}$  NMR (400 MHz, DMSO- $d_6$ ,  $\delta$  ppm): 8.05 (s, 1H, pyrazole-5H), 7.53 (s, 1H, =C-H), 7.49 (d, 2H, Ar-H,  $J = 8.4$  Hz), 7.12 (d, 2H, Ar-H,  $J = 8.8$  Hz), 5.55-5.61 (q, 1H,  $J = 7.2$  Hz), 3.82 (s, 3H,  $\text{OCH}_3$ ), 1.51 (d, 3H,  $\text{CH}_3$ ,  $J = 6.8$  Hz);  $^{13}\text{C}$  NMR (100 MHz, DMSO- $d_6$ ,  $\delta$  ppm): 192.1, 169.6, 166.0, 160.1, 130.1, 125.4, 117.4, 114.6, 112.8, 55.3, 52.8, 13.4; ESI-MS ( $m/z$ ): 388.2 [M-H] $^-$ ; Anal. calcd. for  $\text{C}_{17}\text{H}_{15}\text{N}_3\text{O}_4\text{S}_2$ : C, 52.43; H, 3.88; N, 10.79. Found: C, 52.41; H, 3.85; N, 10.81.

**(S)-2-(5-((3-(4-Methoxyphenyl)-1H-pyrazol-4-yl)methylene)-4-oxo-2-thioxothiazolidin-3-yl)-3-phenylpropanoic acid (13c):** Yield 48%; Mp 122-124 °C; Red solid; FT IR (ATR,  $\nu_{\max}$ ,  $\text{cm}^{-1}$ ): 3279 (O-H), 3001 (Ar-H), 2933 and 2858 (C-H), 1702 (C=O), 1610 (C=N), 1529 (C=C), 1250 (C=S), 1172 (C-O);  $^1\text{H}$  NMR (400 MHz, DMSO- $d_6$ ,  $\delta$  ppm): 7.86 (s, 1H, pyrazole-5H), 7.32-7.35 (m, 3H, Ar-H), 6.92-7.12 (m, 7H, Ar-H, =C-H, Ph), 5.67 (overlapped multiplet, 1H, chiral CH), 3.68 (s, 3H,  $\text{OCH}_3$ ), 3.13-3.16 (m, 2H,  $\text{CH}_2$ );  $^{13}\text{C}$  NMR (100 MHz, DMSO- $d_6$ ,  $\delta$  ppm): 192.1, 169.6, 166.0, 160.1, 136.5, 130.1, 128.9, 128.2, 126.7, 125.4, 117.4, 114.6, 112.8, 58.1, 55.3, 33.1; ESI-MS ( $m/z$ ): 464.2 [M-H] $^-$ ; Anal. calcd. for  $\text{C}_{23}\text{H}_{19}\text{N}_3\text{O}_4\text{S}_2$ : C, 59.34; H, 4.11; N, 9.03. Found: C, 59.31; H, 4.10; N, 9.05.

**(S)-3-(1H-Indol-3-yl)-2-(5-((3-(4-methoxyphenyl)-1H-pyrazol-4-yl)methylene)-4-oxo-2-thioxothiazolidin-3-yl)propanoic acid (13d):** Yield 85%; Mp 160-162 °C; Red solid; FT IR (ATR,  $\nu_{\max}$ ,  $\text{cm}^{-1}$ ): 3274 (O-H), 3001 (Ar-H), 2929 and 2853 (C-H), 1705 (C=O), 1608 (C=N), 1513 (C=C), 1253 (C=S), 1177 (C-O);  $^1\text{H}$  NMR (400 MHz, DMSO- $d_6$ ,  $\delta$  ppm): 10.77 (s, 1H, indole NH), 7.98 (s, 1H, pyrazole-5H), 7.45-7.49 (m, 4H, Ar-H, =C-H), 7.27-7.29 (m, 1H, Ar-H), 7.12-7.15 (d, 2H, Ar-H,  $J = 8.4$  Hz), 6.99-7.05 (m, 2H, Ar-H), 6.89-6.93 (m, 1H, Ar-H),

5.86 (overlapped multiplet, 1H, chiral CH), 3.83 (s, 3H, OCH<sub>3</sub>), 3.58 (dd, 2H, CH<sub>2</sub>,  $J = 14.8$  Hz, 5.2 Hz); <sup>13</sup>C NMR (100 MHz, DMSO-*d*<sub>6</sub>,  $\delta$  ppm): 192.1, 169.1, 166.3, 160.1, 135.9, 130.1, 127.1, 125.2, 123.7, 120.9, 118.4, 117.8, 114.6, 112.7, 111.3, 108.9, 58.0, 55.3, 23.0; ESI-MS ( $m/z$ ): 503.2 [M-H]<sup>-</sup>; Anal. calcd. for C<sub>25</sub>H<sub>20</sub>N<sub>4</sub>O<sub>4</sub>S<sub>2</sub>: C, 59.51; H, 4.00; N, 11.10. Found: C, 59.49; H, 4.10; N, 11.06.

**(S)-2-(5-((3-(3,5-Difluorophenyl)-1H-pyrazol-4-yl)methylene)-4-oxo-2-thioxothiazolidin-3-yl)acetic acid (13e):** Yield 83%; Mp 108-110 °C; Yellow solid; FT IR (ATR,  $\nu_{\max}$ , cm<sup>-1</sup>): 3325 (O-H), 3001 (Ar-H), 2929 and 2848 (C-H), 1703 (C=O), 1605 (C=N), 1512 (C=C), 1253 (C=S), 1122 (C-F), 1060 (C-O); <sup>1</sup>H NMR (400 MHz, DMSO-*d*<sub>6</sub>,  $\delta$  ppm): 8.16 (s, 1H, pyrazole-5H), 7.51 (s, 1H, =C-H), 7.29-7.38 (m, 3H, Ar-H), 3.57 (s, 2H, CH<sub>2</sub>); <sup>13</sup>C NMR (100 MHz, DMSO-*d*<sub>6</sub>,  $\delta$  ppm): 192.5, 167.2, 166.0, 162.5 (d,  $^1J_{F-C} = 245.5$  Hz), 124.7, 119.4, 113.3, 111.8 (d,  $^2J_{F-C} = 26$  Hz), 104.4, 43.1; ESI-MS ( $m/z$ ): 374.2 [M-H]<sup>-</sup>; Anal. calcd. for C<sub>15</sub>H<sub>9</sub>N<sub>3</sub>F<sub>2</sub>O<sub>3</sub>S<sub>2</sub>: C, 47.24; H, 2.38; N, 11.02. Found: C, 47.27; H, 2.35; N, 11.04.

**(S)-2-(5-((3-(3,5-Difluorophenyl)-1H-pyrazol-4-yl)methylene)-4-oxo-2-thioxothiazolidin-3-yl)propanoic acid (13f):** Yield 57%; Mp 110-112 °C; Yellow solid; FT IR (ATR,  $\nu_{\max}$ , cm<sup>-1</sup>): 3246 (O-H), 3087 (Ar-H), 2922 and 2858 (C-H), 1712 (C=O), 1604 (C=N), 1534 (C=C), 1243 (C=S), 1120 (C-F), 1056 (C-O); <sup>1</sup>H NMR (400 MHz, DMSO-*d*<sub>6</sub>,  $\delta$  ppm): 8.21 (s, 1H, pyrazole-5H), 7.55 (s, 1H, =C-H), 7.29-7.38 (m, 3H, Ar-H), 5.55-5.61 (q, 1H, chiral CH,  $J = 7.2$  Hz), 1.52 (d, 3H, CH<sub>3</sub>,  $J = 7.2$  Hz); <sup>13</sup>C NMR (100 MHz, DMSO-*d*<sub>6</sub>,  $\delta$  ppm): 192.1, 169.5, 165.9, 162.5 (d,  $^1J_{F-C} = 246$  Hz), 124.4, 118.9, 113.3, 111.8 (d,  $^2J_{F-C} = 19$  Hz), 104.3, 52.8, 13.3; ESI-MS ( $m/z$ ): 394.2 [M-H]<sup>-</sup>; Anal. calcd. for C<sub>16</sub>H<sub>11</sub>N<sub>3</sub>F<sub>2</sub>O<sub>3</sub>S<sub>2</sub>: C, 48.60; H, 2.80; N, 10.63. Found: C, 48.57; H, 2.81; N, 10.66.

**(S)-2-(5-((3-(3,5-Difluorophenyl)-1H-pyrazol-4-yl)methylene)-4-oxo-2-thioxothiazolidin-3-yl)-3-phenylpropanoic acid (13g):** Yield 61%; Mp 114-116 °C; Yellow solid; FT IR (ATR,  $\nu_{\max}$ , cm<sup>-1</sup>): 3253 (O-H), 3025 (Ar-H), 2924 and 2858 (C-H), 1716 (C=O), 1604 (C=N), 1535 (C=C), 1230 (C=S), 1122 (C-F); <sup>1</sup>H NMR (400 MHz, DMSO-*d*<sub>6</sub>,  $\delta$  ppm): 8.29 (s, 1H, pyrazole-5H), 7.54 (s, 1H, =C-H), 7.32-7.41 (m, 3H, Ar-H), 7.14-7.22 (m, 5H, Ar-H), 5.85 (overlapped multiplet, 1H, chiral CH), 3.29-3.33 (m, 2H, CH<sub>2</sub>); <sup>13</sup>C NMR (100 MHz, DMSO-*d*<sub>6</sub>,  $\delta$  ppm): 192.2, 168.7, 166.2, 162.5 (d,  $^1J_{F-C} = 246$  Hz), 136.5, 128.9, 128.2, 126.6, 124.6, 118.3, 113.2, 111.8 (d,  $^2J_{F-C} = 26$  Hz), 104.3, 58.2, 33.1; ESI-MS ( $m/z$ ): 470.2 [M-H]<sup>-</sup>; Anal. calcd. for C<sub>22</sub>H<sub>15</sub>N<sub>3</sub>F<sub>2</sub>O<sub>3</sub>S<sub>2</sub>: C, 56.04; H, 3.21; N, 8.91. Found: C, 56.01; H, 3.24; N, 8.89.

**(S)-2-(5-((3-(3,5-Difluorophenyl)-1H-pyrazol-4-yl)methylene)-4-oxo-2-thioxothiazolidin-3-yl)-3-(1H-indol-3-yl)propanoic acid (13h):** Yield 83%; Mp 120-122 °C; Yellow solid; FT IR (ATR,  $\nu_{\max}$ ,  $\text{cm}^{-1}$ ): 3411 (O-H), 3081 (Ar-H), 2924 and 2858 (C-H), 1709 (C=O), 1604 (C=N), 1534 (C=C), 1223 (C=S), 1121 (C-F);  $^1\text{H}$  NMR (400 MHz, DMSO- $d_6$ ,  $\delta$  ppm): 10.77 (s, 1H, indole-NH), 8.16 (s, 1H, pyrazole-5H), 7.51 (s, 1H, =C-H), 7.45-7.47 (m, 1H, Ar-H), 7.36-7.45 (m, 1H, Ar-H), 7.26-7.30 (m, 3H, Ar-H), 6.99-7.05 (m, 2H, Ar-H), 6.89-6.92 (m, 1H, Ar-H), 5.86 (s, 1H, chiral C-H), 3.58 (dd, 2H,  $\text{CH}_2$ ,  $J = 14.8$  Hz and 4.8 Hz);  $^{13}\text{C}$  NMR (100 MHz, DMSO- $d_6$ ,  $\delta$  ppm): 192.1, 169.0, 166.2, 162.5 (d,  $^1J_{\text{F-C}} = 245.5$  Hz), 135.9, 127.0, 124.2, 123.7, 120.9, 118.6, 118.4, 117.8, 113.2, 111.7 (d,  $^2J_{\text{F-C}} = 19$  Hz), 108.9, 104.4, 58.1, 23.0; ESI-MS ( $m/z$ ): 509.2 [M-H] $^-$ ; Anal. calcd. for  $\text{C}_{24}\text{H}_{16}\text{N}_4\text{F}_2\text{O}_3\text{S}_2$ : C, 56.46; H, 3.16; N, 10.97. Found: C, 56.42; H, 3.18; N, 10.94.

**(S)-2-(5-((3-(4-Nitrophenyl)-1H-pyrazol-4-yl)methylene)-4-oxo-2-thioxothiazolidin-3-yl)acetic acid (13i):** Yield 72%; Mp 136-138 °C; Yellow solid; FT IR (ATR,  $\nu_{\max}$ ,  $\text{cm}^{-1}$ ): 3332 (O-H), 3116 (Ar-H), 2967 and 2856 (C-H), 1703 (C=O), 1601 (C=N), 1548 (C=C), 1332 (N=O), 1241 (C=S), 1127 (C-O);  $^1\text{H}$  NMR (400 MHz, DMSO- $d_6$ ,  $\delta$  ppm): 8.40 (d, 2H, Ar-H,  $J = 8.0$  Hz), 8.30 (s, 1H, pyrazole-5H), 7.87 (d, 2H, Ar-H,  $J = 8.4$  Hz), 7.56 (s, 1H, =C-H), 3.56 (s, 2H,  $\text{CH}_2$ );  $^{13}\text{C}$  NMR (100 MHz, DMSO- $d_6$ ,  $\delta$  ppm): 192.1, 169.6, 165.9, 147.4, 129.8, 124.3, 124.1, 119.3, 113.6, 43.1; ESI-MS ( $m/z$ ): 479.2 [M-H] $^-$ ; Anal. calcd. for  $\text{C}_{15}\text{H}_{10}\text{N}_4\text{O}_5\text{S}_2$ : C, 46.15; H, 2.58; N, 14.35. Found: C, 46.12; H, 2.55; N, 14.29.

**(S)-2-(5-((3-(4-Nitrophenyl)-1H-pyrazol-4-yl)methylene)-4-oxo-2-thioxothiazolidin-3-yl)propanoic acid (13j):** Yield 68%; Mp 240-242 °C; Yellow solid; FT IR (ATR,  $\nu_{\max}$ ,  $\text{cm}^{-1}$ ): 3223 (O-H), 3116 (Ar-H), 2967 and 2862 (C-H), 1702 (C=O), 1601 (C=N), 1548 (C=C), 1336 (N=O), 1247 (C=S), 1127 (C-O);  $^1\text{H}$  NMR (400 MHz, DMSO- $d_6$ ,  $\delta$  ppm): 8.39 (d, 2H, Ar-H,  $J = 8.4$  Hz), 8.30 (s, 1H, pyrazole-5H), 7.87 (d, 2H, Ar-H,  $J = 8.8$  Hz), 7.58 (s, 1H, =C-H), 5.56-5.62 (q, 1H, chiral CH,  $J = 7.2$  Hz), 1.52 (d, 3H,  $\text{CH}_3$ ,  $J = 6.8$  Hz);  $^{13}\text{C}$  NMR (100 MHz, DMSO- $d_6$ ,  $\delta$  ppm): 192.1, 169.5, 165.9, 147.4, 129.7, 124.3, 124.1, 119.3, 113.6, 52.8, 13.3; ESI-MS ( $m/z$ ): 403.2 [M-H] $^-$ ; Anal. calcd. for  $\text{C}_{16}\text{H}_{12}\text{N}_4\text{O}_5\text{S}_2$ : C, 47.52; H, 2.99; N, 13.85. Found: C, 47.55; H, 2.96; N, 13.82.

**(S)-2-(5-((3-(4-Nitrophenyl)-1H-pyrazol-4-yl)methylene)-4-oxo-2-thioxothiazolidin-3-yl)-3-phenylpropanoic acid (13k):** Yield 67%; Mp 90-92 °C; Yellow solid; FT IR (ATR,  $\nu_{\max}$ ,  $\text{cm}^{-1}$ ): 3256 (O-H), 3025 (Ar-H), 2921 and 2851 (C-H), 1713 (C=O), 1601 (C=N), 1337 (N=O), 1230 (C=S), 1107 (C-O);  $^1\text{H}$  NMR (400 MHz, DMSO- $d_6$ ,  $\delta$  ppm): 8.40 (d, 2H, Ar-H,  $J = 8.0$

Hz), 8.30 (s, 1H, pyrazole-5H), 7.87 (d, 2H, Ar-H,  $J = 8.4$  Hz), 7.56 (s, 1H, =C-H), 7.13-7.2 (m, 5H, Ar-H), 5.86 (overlapped multiplet, 1H, chiral CH), 2.09 (s, 2H, CH<sub>2</sub>); <sup>13</sup>C NMR (100 MHz, DMSO-*d*<sub>6</sub>,  $\delta$  ppm): 192.1, 168.7, 166.1, 147.4, 136.5, 129.7, 128.9, 128.2, 126.7, 124.4, 124.1, 118.6, 113.5, 58.1, 33.1; ESI-MS ( $m/z$ ): 479.2 [M-H]<sup>-</sup>; Anal. calcd. for C<sub>22</sub>H<sub>16</sub>N<sub>4</sub>O<sub>5</sub>S<sub>2</sub>: C, 54.99; H, 3.36; N, 11.66. Found: C, 54.96; H, 3.38; N, 11.63.

**(S)-3-(1H-indol-3-yl)-2-(5-((3-(4-nitrophenyl)-1H-pyrazol-4-yl)methylene)-4-oxo-2-thioxothiazolidin-3-yl)propanoic acid (13I):** Yield 83%; Mp 152-154 °C; Yellow solid; FT IR (ATR,  $\nu_{\max}$ , cm<sup>-1</sup>): 3271 (O-H), 3023 (Ar-H), 2928 and 2852 (C-H), 1713 (C=O), 1603 (C=N), 1334 (N=O), 1231 (C=S), 1108 (C-O); <sup>1</sup>H NMR (400 MHz, DMSO-*d*<sub>6</sub>,  $\delta$  ppm): 10.84 (s, 1H, indole-NH), 8.47 (d, 2H, Ar-H,  $J = 8.3$  Hz), 8.38 (s, 1H, pyrazole-5H), 7.92 (d, 2H, Ar-H,  $J = 8.5$  Hz), 7.59 (s, 1H, =C-H), 7.53 (d, 1H, Ar-H,  $J = 7.6$  Hz), 7.33 (d, 1H, Ar-H,  $J = 8.0$  Hz), 7.11 (s, 1H, Ar-H), 7.05-7.09 (m, 1H, Ar-H), 6.95-6.99 (m, 1H, Ar-H), 5.91 (overlapped multiplet, 1H, chiral CH), 3.64 (dd, 2H, CH<sub>2</sub>,  $J = 15.2$  Hz, 5.2 Hz); <sup>13</sup>C NMR (100 MHz, DMSO-*d*<sub>6</sub>,  $\delta$  ppm): 192.1, 169.4, 166.1, 147.6, 135.9, 129.7, 127.1, 124.3, 124.1, 123.7, 120.9, 119.3, 118.4, 117.8, 113.6, 111.3, 108.9, 55.3, 23.0; ESI-MS ( $m/z$ ): 518.2 [M-H]<sup>-</sup>; Anal. calcd. for C<sub>24</sub>H<sub>17</sub>N<sub>5</sub>O<sub>5</sub>S<sub>2</sub>: C, 55.48; H, 3.30; N, 13.48. Found: C, 55.44; H, 3.28; N, 13.45.

Figure S8. Mass,  $^1\text{H}$  and  $^{13}\text{C}$  NMR spectral data of the compounds.







\*MSD1 SPC, time=0.071:0.373 of C:\CHEM32\1\DATA\MARCH 2016\010316 2016-03-01 16-04-41\7C.D MM-ES+APCI, Scan, F



```

NAME      Nikil,Mangloore UTY
EXPNO     6
PROCNO    1
Date_     20151119
Time      11.08
INSTRUM   spect
PROBHD    5 mm PABBO BH-
PULPROG   zg30
TD         65536
SOLVENT   CDCl3
NS         64
DS         0
SWH        8223.685 Hz
FIDRES     0.125483 Hz
AQ         3.9846387 sec
RG         22.4
DW         60.800 usec
DE         6.50 usec
TE         299.4 K
D1         2.00000000 sec
TDO        1
----- CHANNEL f1 -----
NUC1       1H
P1         13.25 usec
PL1        0.00 dB
PL1W       14.06656361 W
SFO1       400.1224709 MHz
SI         32768
SF         400.1200375 MHz
WDW        EM
SSB        0
LB         0.30 Hz
GB         0
PC         1.00
  
```

8.491  
8.487  
7.970  
7.966  
7.948  
7.944  
7.617  
7.596  
7.447  
7.431  
7.426  
7.411  
7.405  
7.390  
7.320  
7.300  
7.121  
7.100  
7.079  
4.373  
4.356  
4.338  
4.320  
3.813  
3.803  
3.792  
3.782  
3.772  
3.761  
3.751  
3.742  
2.140  
2.110  
2.091  
2.083  
2.061  
2.052  
1.993











```

NAME      Nikil,Mangloore UTY
EXPNO     16
PROCNO    1
Date_     20160305
Time      13.05
INSTRUM   spect
PROBHD    5 mm PABBO BB-
PULPROG   zg30
TD         65536
SOLVENT   DMSO
NS         64
DS         0
SWH        8223.685 Hz
FIDRES     0.125483 Hz
AQ         3.9846387 sec
RG         22.6
SW         60.800 usec
DE         6.50 usec
TE         299.9 K
D1         2.0000000 sec
TDO        1
----- CHANNEL f1 -----
NUC1      1H
P1         12.75 usec
PL1        0.00 dB
PL1W       14.06556361 W
SFO1       400.1224709 MHz
SI         32768
SF         400.1200025 MHz
WDW        EM
SSB        0
LB         0.30 Hz
GB         0
PC         1.00
  
```



NAME Nikil,Mangloore UTY  
 EXPNO 17  
 PROCNO 1  
 Date\_ 20160305  
 Time 13.20  
 INSTRUM spect  
 PROBHD 5 mm PABBO BB-  
 PULPROG zgpg30  
 TD 65536  
 SOLVENT DMSO  
 NS 983  
 DS 4  
 SWH 24038.461 Hz  
 FIDRES 0.266798 Hz  
 AQ 1.3631988 sec  
 RG 36  
 DW 20.800 usec  
 DE 6.50 usec  
 TE 300.7 K  
 D1 2.0000000 sec  
 D11 0.0300000 sec  
 TDO 1

----- CHANNEL f1 -----  
 NUC1 13C  
 P1 9.25 usec  
 PL1 -2.00 dB  
 PL1W 55.73500443 W  
 SFO1 100.6203150 MHz

----- CHANNEL f2 -----  
 CPDPRG2 waltz16  
 NUC2 1H  
 PCPD2 80.00 usec  
 PL2 0.00 dB  
 PL12 15.95 dB  
 PL13 20.32 dB  
 PL2W 14.06656361 W  
 PL12W 0.35742757 W  
 PL13W 0.13067366 W  
 SFO2 400.1216005 MHz  
 SI 32769  
 SF 100.6103043 MHz  
 WDW EM  
 SSB 0  
 LB 1.00 Hz  
 GB  
 PC 1.40

— 166.989  
 — 160.385  
 — 154.628  
 — 142.735  
 — 135.682  
 — 130.821  
 — 127.789  
 — 122.532  
 — 121.699  
 — 118.846  
 — 114.217  
 — 112.404

58.601  
 56.670  
 55.317

30.525  
 29.624  
 25.514  
 24.381  
 19.383  
 18.846









NAME Nik11,Mangloore UTY  
 EXPNO 27  
 PROCNO 1  
 Date\_ 20160309  
 Time 13.06  
 INSTRUM spect  
 PROBRD 5 mm PABBO BB-  
 PULPROG zgpg30  
 TD 65536  
 SOLVENT DMSO  
 NS 1024  
 DS 4  
 SWH 24038.461 Hz  
 FIDRES 0.2366798 Hz  
 AQ 1.3631988 sec  
 RG 36  
 DW 20.800 usec  
 DE 6.50 usec  
 TE 301.5 K  
 D1 2.0000000 sec  
 D11 0.0300000 sec  
 TDO 1

----- CHANNEL f1 -----  
 NUC1 13C  
 P1 9.25 usec  
 PL1 -2.00 dB  
 FL1W 55.73500443 W  
 SFO1 100.6203150 MHz

----- CHANNEL f2 -----  
 CPDPRG2 waltz16  
 NUC2 1H  
 PCPD2 80.00 usec  
 PL2 0.00 dB  
 PL12 15.95 dB  
 PL13 20.32 dB  
 PL2W 14.06656361 W  
 PL12W 0.35742757 W  
 PL13W 0.13067366 W  
 SFO2 400.1216005 MHz  
 SI 32768  
 SF 100.6103043 MHz  
 WDW EM  
 SSB 0  
 LB 1.00 Hz  
 GB 0  
 PC 1.40

— 173.718  
 — 166.599  
 — 160.444  
 — 154.603  
 — 136.079  
 — 135.623  
 — 130.860  
 — 127.605  
 — 127.139  
 — 123.568  
 — 121.614  
 — 120.898  
 — 118.540  
 — 118.359  
 — 118.102  
 — 114.225  
 — 112.491  
 — 111.382  
 — 110.519

— 56.723  
 — 55.328  
 — 53.749

— 30.488  
 — 26.643  
 — 25.496  
 — 24.339



NAME Nikil,Mangloore UTY  
 EXPNO 56  
 PROCNO 1  
 Date\_ 20160901  
 Time\_ 11.13  
 INSTRUM spect  
 PROBD 5 mm PABBO BB-  
 PULPROG zgpg30  
 TD 65536  
 SOLVENT DMSO  
 NS 64  
 DS 0  
 SWH 8223.685 Hz  
 FIDRES 0.125483 Hz  
 AQ 3.9846387 sec  
 RG 71.8  
 DW 60.800 usec  
 DE 6.50 usec  
 TE 273.2 K  
 D1 2.00000000 sec  
 TDO 1

----- CHANNEL f1 -----  
 NUC1 1H  
 P1 12.75 usec  
 PL1 0.00 dB  
 PL1W 14.06656361 W  
 SFO1 400.1224709 MHz  
 SI 32768  
 SF 400.1200007 MHz  
 MDW DM  
 SSB 0  
 LB 0.30 Hz  
 GB 0  
 PC 1.00

8.644  
8.626  
8.289  
7.941  
7.919  
7.844  
7.822  
7.752  
7.738  
7.717  
7.717  
7.462  
7.440  
7.418  
4.485  
4.467  
4.449  
4.431  
4.413  
4.261  
4.230  
4.200  
2.322  
2.296  
2.291  
2.266  
2.236  
1.935  
1.907  
1.861  
1.830  
1.656  
1.627  
1.440  
1.421  
1.377  
1.358  
1.345  
1.325  
1.294  
1.262  
1.232



174.485  
172.656  
166.303  
164.165  
161.705  
153.754  
142.660  
135.639  
131.846  
131.761  
127.757  
126.892  
121.866  
118.906  
115.967  
115.752  
112.578  
56.791  
48.378  
30.514  
25.454  
24.340  
17.073

NAME Nikil,Mangloore UTY  
 EXPNO 41  
 PROCNO 1  
 Date\_ 20160901  
 Time\_ 15.48  
 INSTRUM spect  
 PROBD 5 mm PABBO BB-  
 PULPROG zgpg30  
 TD 65536  
 SOLVENT DMSO  
 NS 1024  
 DS 4  
 SWH 24038.461 Hz  
 FIDRES 0.366798 Hz  
 AQ 1.3631988 sec  
 RG 362  
 DW 20.800 usec  
 DE 6.50 usec  
 TE 273.2 K  
 D1 2.00000000 sec  
 D11 0.03000000 sec  
 TDO 1

----- CHANNEL f1 -----  
 NUC1 13C  
 P1 9.25 usec  
 PL1 -2.00 dB  
 PL1W 55.73500443 W  
 SFO1 100.6203150 MHz

----- CHANNEL f2 -----  
 CPDPRG2 waltz16  
 NUC2 1H  
 PCPD2 80.00 usec  
 PL2 0.00 dB  
 PL12 15.95 dB  
 PL13 20.32 dB  
 PL2W 14.06656361 W  
 PL12W 0.35742757 W  
 PL13W 0.13067366 W  
 SFO2 400.1216005 MHz  
 SI 32768  
 SF 100.6103043 MHz  
 MDW DM  
 SSB 0  
 LB 1.00 Hz  
 GB 0  
 PC 1.40























SAIFNM180813C-03 (MGR)



SAIFNM180813C-04 (MGR)



SAIFNM170420A-11 (MARA)



SAIFNM170420A-12 (MARA)





SAIFNM170125B-01 (MeO-PRAA)



NAME Nikil,Mangloore UTY  
 EXPNO 149  
 PROCNO 1  
 Date\_ 20170206  
 Time 11.06  
 INSTRUM spect  
 PROBHD 5 mm PABBO BB-  
 PULPROG zgpg30  
 TD 65536  
 SOLVENT DMSO  
 NS 1024  
 DS 4  
 SWH 24038.461 Hz  
 FIDRES 0.366798 Hz  
 AQ 1.3631988 sec  
 RG 512  
 DW 20.800 usec  
 DE 6.50 usec  
 TE 297.2 K  
 D1 2.0000000 sec  
 D11 0.0300000 sec  
 TDO 1

===== CHANNEL f1 =====  
 NUC1 13C  
 P1 9.25 usec  
 PL1 -2.00 dB  
 PL1W 55.73500443 W  
 SFO1 100.6203150 MHz

===== CHANNEL f2 =====  
 CPDPRG2 waltz16  
 NUC2 1H  
 P2 80.00 usec  
 PL2 0.00 dB  
 PL12 15.95 dB  
 PL13 20.32 dB  
 PL12W 14.06656361 W  
 PL12W 0.35742757 W  
 PL13W 0.13067366 W  
 SFO2 400.1216005 MHz  
 SI 32768  
 SF 100.6103043 MHz  
 MDW EM  
 SSB 0  
 LB 1.00 Hz  
 GB 0  
 PC 1.40



SAIFNM170420A-01 (MT)



SAIFNM170420A-02 (MT)



SAIFNM180813C-07 (FGR)



SAIFNM180813C-08 (FGR)





SAIFNM170420A-07 (FARA)



SAIFNM170420A-08 (FARA)





SAIFNM170125B-05 (F2-PRAA)



SAIFNM170125B-06 (F2-PRAA)



SAIFNM170420A-03 (FT)



SAIFNM170420A-04 (FT)







SAIFNM170420A-09 (NARA)



SAIFNM170420A-10 (NARA)



SAIFNM170125B-03 (NO2-PRAA)



SAIFNM170125B-04 (NO2-PRAA)



SAIFNM180212A-13 (NTRA)
